# Supplementary material for: MicroRNA-195 inhibits proliferation, invasion and metastasis in breast cancer cells by targeting FASN, HMGCR, ACACA and CYP27B1
Source: PubMed Central journal article supplement (PMC4668367; doi:10.1038/srep17454), 2015-12-03
Supplement: srep17454-s1.pdf [file srep17454-s1.pdf]

# **MicroRNA-195 inhibits proliferation, invasion and metastasis in breast cancer cells by targeting FASN, HMGCR, ACACA and CYP27B1**

**Richa Singh<sup>1</sup>, Vikas Yadav<sup>1</sup>, Sachin kumar<sup>1</sup>, Neeru Saini<sup>1</sup> \***

<sup>1</sup>Functional Genomics Unit, CSIR-Institute of Genomics and Integrative Biology (IGIB).  
Council of Scientific & Industrial Research (CSIR), Delhi, India.

## Supplementary Figure S1

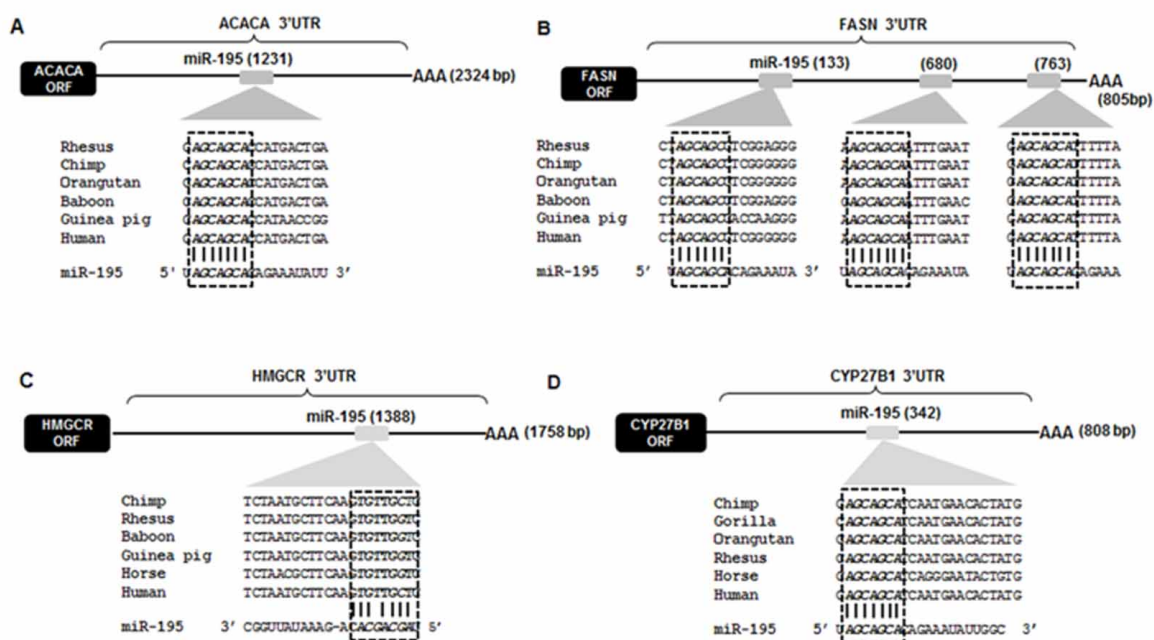

**Predicted binding site of miR-195 in FASN, HMGCR, ACACA, CYP27B1**

## Supplementary Figure S2

### Differentially expressed genes after overexpression or depletion of has-miR-195

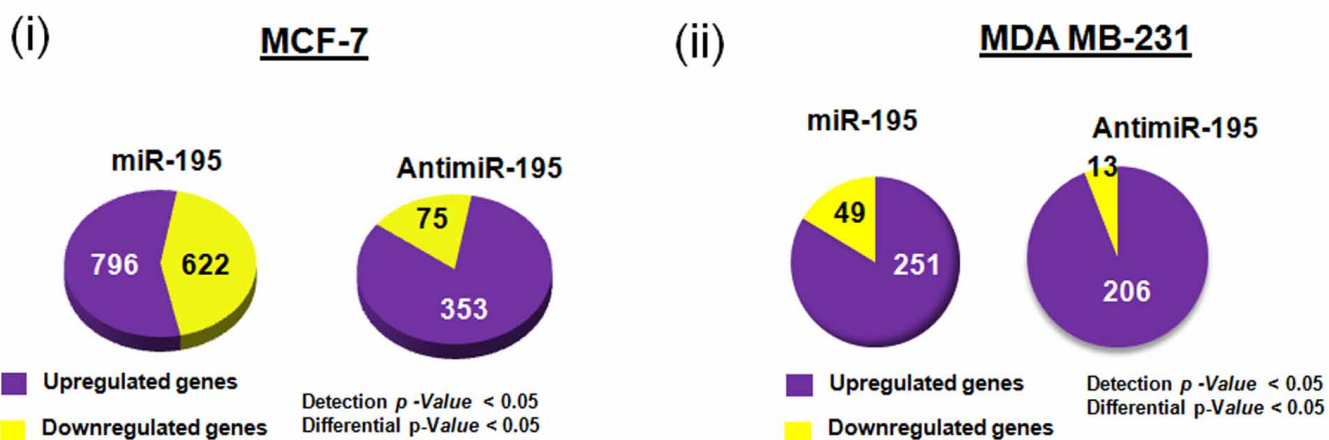

### (ii) Quantitative analysis of Mitochondrial Calcium

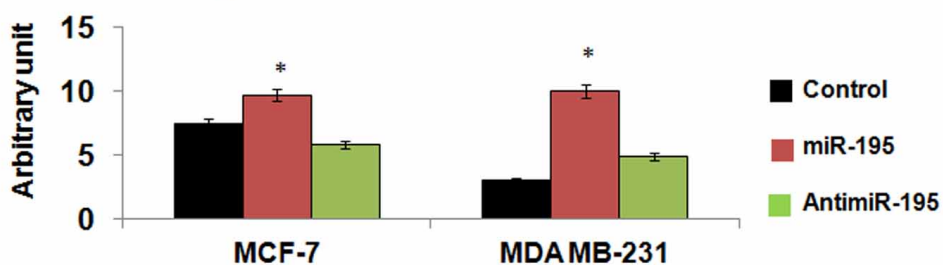

**Supplementary Figure S3**

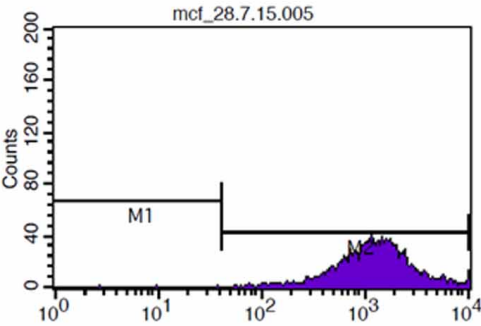

**MCF-7**

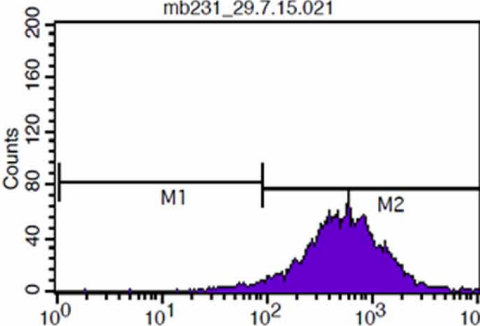

**MDA MB-231**

**Region M1 (Day 0) has been gated to show the percentage of proliferated cells at Day 2 and is represented in the form of bar graph in Figure 7A.**

## Supplementary Figure S4

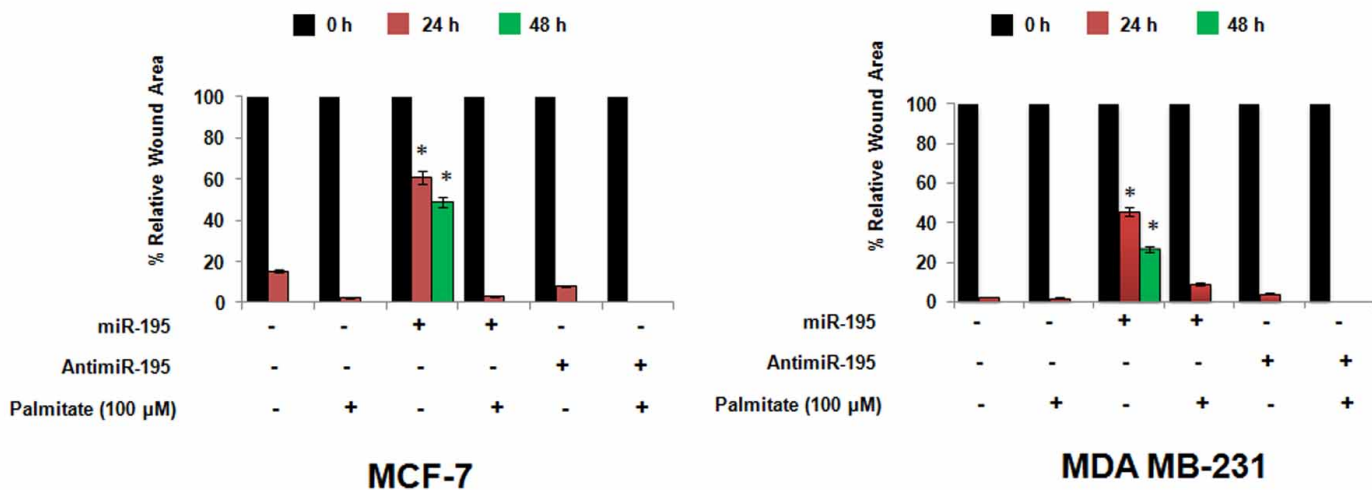

**Quantitative analysis of Wound Healing assay:** Graphical representation of the quantitative values of the wound / scratch size after miR-195 and AntimiR transfection in presence or absence of Palmitate at different time points as determined by the WimScratch module of Wimasis online software. The bar diagram represent mean  $\pm$  S.D for three independent experiments. \*  $p < 0.01$

## Supplementary Figure S5

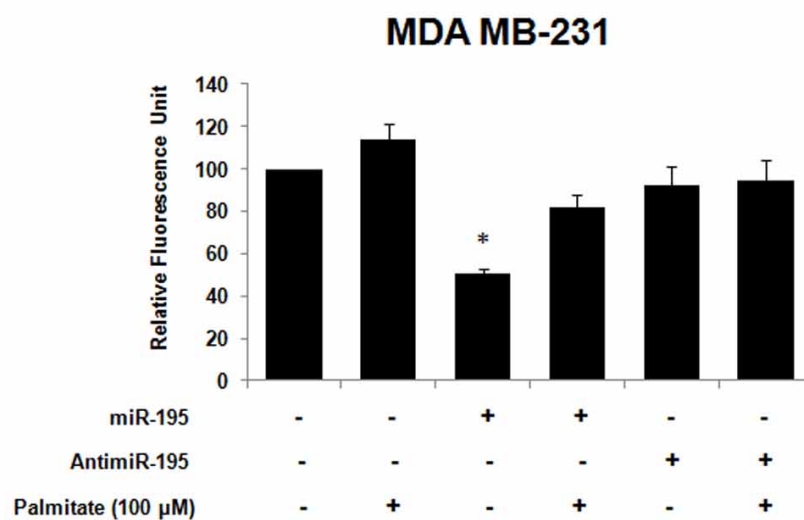

**Quantitative analysis of Invasion assay:** Graphical representation of the quantitative values of the invasion assay as determined by the colorimetric analysis using cell lytic buffer and further reading at 550nm. The bar diagram represent mean  $\pm$  S.D for three independent experiments. \* p < 0.01

## SUPPLEMENTARY INFORMATION

### MicroRNA-195 attenuates Epithelial-Mesenchymal-Transition (EMT) in breast cancer cells by targeting FASN, HMGCR, ACACA and CYP27B1

Richa Singh, Vikas Yadav, Sachin Kumar and Neeru Saini.

**Supplementary Table S1:** List of primers used in the present study

|                                    |                            |
|------------------------------------|----------------------------|
| <b>18S rRNA FP</b>                 | GTAACCCGTTGAACCCATT        |
| <b>18S rRNA RP</b>                 | CCATCCAATCGGTAGTAGCG       |
| <b>PGC-1<math>\alpha</math> FP</b> | TGCCCT GGATTGTTGACATGA     |
| <b>PGC-1<math>\alpha</math> RP</b> | TTTGTCTCAGGCTGGGGGTAGG     |
| <b>PPAR<math>\alpha</math> FP</b>  | GGCGAGGATAGTTCTGGAAGC      |
| <b>PPAR<math>\alpha</math> RP</b>  | CACAGGATAAGTCACCGAGGAG     |
| <b>LXR<math>\alpha</math> FP</b>   | GTTATAACCGGGAAGACTTTGCCA   |
| <b>LXR<math>\alpha</math> RP</b>   | GCCTCTCTACCTGGAGCTGGT      |
| <b>LXR<math>\beta</math> FP</b>    | CGTGGACTTCGCTAAGCAAGTG     |
| <b>LXR<math>\beta</math> RP</b>    | GGTGGAAAGTCGTCCTTGCTGTAGG  |
| <b>SREBP2 FP</b>                   | AGGAGAACATGGTGCTGA         |
| <b>SREBP2 RP</b>                   | TAAAGGAGAGGCACAGGA         |
| <b>SREBP1 FP</b>                   | GCAAGGCCATCGACTACATT       |
| <b>SREBP1 RP</b>                   | GGTCAGTGTGTCCTCCACCT       |
| <b>HMGCS1 FP</b>                   | TCCCACTCCAAATGATGACA       |
| <b>HMGCS1 RP</b>                   | CTTCAGGTTCTGCTGCTGTG       |
| <b>IDI1 FP</b>                     | GCATCGAGCTTTTAGTGTCTTCT    |
| <b>IDI1 RP</b>                     | GGCTGGATTGCTTAATGGATGA     |
| <b>LDLR FP</b>                     | GTCTTGGCACTGGAACCTCGT      |
| <b>LDLR RP</b>                     | CTGGAAATTGCGCTGGAC         |
| <b>ABCA1 FP</b>                    | GCACTGAGGAAGATGCTGAAA      |
| <b>ABCA1 RP</b>                    | AGTTCCTGGAAGGTCTTGTTTAC    |
| <b>ABCG1 FP</b>                    | CAGGAAGATTAGACACTGTGG      |
| <b>ABCG1 RP</b>                    | GAAAGGGGAATGGAGAGAAGA      |
| <b>ABCG5 FP</b>                    | ACCCAAAGCAAGGAACGGGAA      |
| <b>ABCG5 RP</b>                    | CAGCGTTCAGCATGCCTGTGT      |
| <b>NR113 FP</b>                    | AGTTGCACAGGTGTTTGCTG       |
| <b>NR113 RP</b>                    | GTGCTTAGATGCTGGCATGA       |
| <b>CYP2B6 FP</b>                   | ATGGGGCACTGAAAAAGACTGA     |
| <b>CYP2B6 RP</b>                   | AGAGGCGGGGACACTGAATGAC     |
| <b>ACACA FP</b>                    | AATCTTGAGGGCTAGGTCTTTCTGGA |
| <b>ACACA RP</b>                    | CCAGAGGTTGGGCAAGGGA        |
| <b>FASN FP</b>                     | CAGAGTCGGAGAAGTTCAG        |
| <b>FASN RP</b>                     | GGAGGCATCAAACCTAGACAG      |
| <b>HMGCR FP</b>                    | TCGGTGGCCTCTAGTGAGAT       |
| <b>HMGCR RP</b>                    | TGTCCCCACTATGACTTCCC       |
| <b>CYP27B1 FP</b>                  | TGGCCAGATCCTAACACATTT      |
| <b>CYP27B1 RP</b>                  | GTCCGGGTCTTGGGTCTAACT      |

**Supplementary Table S2:** The list of 1418 differentially expressed genes after over-expression of hsa-miR-195 in MCF7 cells

| GENE     | FOLD CHANGE | GENE     | FOLD CHANGE | GENE      | FOLD CHANGE | GENE     | FOLD CHANGE |
|----------|-------------|----------|-------------|-----------|-------------|----------|-------------|
| AAMP     | 1.406722    | AP4E1    | 1.603214    | BBS2      | 0.599011    | C15ORF39 | 1.448212    |
| AARSD1   | 1.896856    | APBA3    | 1.89414     | BCKDK     | 0.665757    | C15ORF42 | 1.932431    |
| AATF     | 1.58622     | APP      | 0.651712    | BCL11A    | 0.71586     | C16ORF48 | 1.68059     |
| ABHD14A  | 0.687401    | AQP11    | 0.454974    | BCL3      | 2.634313    | C16ORF52 | 0.649889    |
| ACBD6    | 1.384792    | ARC      | 3.395515    | BCYRN1    | 3.042853    | C16ORF68 | 1.854429    |
| ACD      | 1.423573    | ARID3B   | 1.443875    | BEX4      | 0.562305    | C16ORF7  | 1.920338    |
| ACIN1    | 1.492325    | ARL1     | 0.687927    | BIRC6     | 1.454864    | C16ORF74 | 0.562434    |
| ACSM3    | 0.565535    | ARL16    | 1.75541     | BMI1      | 0.657751    | C16ORF75 | 0.656651    |
| ACTA1    | 2.806901    | ARL2     | 0.646104    | BNC2      | 0.641357    | C17ORF67 | 1.672934    |
| ACTR6    | 0.704585    | ARL6IP5  | 0.689749    | BNIP3L    | 0.607638    | C19ORF22 | 1.554116    |
| ADAL     | 0.629874    | ARMC6    | 1.442871    | BP75      | 0.580623    | C19ORF29 | 1.735426    |
| ADAMTS1  | 0.672067    | ARPC1B   | 0.482248    | BRAF      | 2.629773    | C19ORF30 | 2.941134    |
| ADAP2    | 0.564443    | ARSK     | 0.59205     | BRPF1     | 1.597267    | C19ORF40 | 0.554032    |
| ADCK1    | 1.638868    | ARV1     | 0.716383    | BSN       | 2.588085    | C19ORF42 | 0.663684    |
| ADH5     | 0.432273    | ASB13    | 0.600652    | BTF3L4    | 0.51966     | C1ORF102 | 1.973908    |
| ADORA2B  | 0.587941    | ASB9     | 0.412629    | BUD13     | 1.682624    | C1ORF162 | 2.228043    |
| ADRM1    | 1.497022    | ASCC2    | 1.454681    | BUD31     | 1.339298    | C1ORF182 | 0.479156    |
| AEN      | 2.927039    | ASGR1    | 0.538345    | C10ORF114 | 0.442027    | C1ORF50  | 1.693135    |
| AGBL5    | 1.232442    | ATAD3A   | 2.089899    | C10ORF137 | 1.290311    | C1QBP    | 0.645912    |
| AHI1     | 1.568372    | ATF7IP2  | 1.812408    | C10ORF41  | 0.318084    | C1RL     | 0.501254    |
| AHSA2    | 1.325811    | ATG2A    | 1.65495     | C10ORF57  | 0.657055    | C20ORF55 | 1.640115    |
| AIM1L    | 1.895868    | ATL2     | 0.714907    | C10ORF75  | 0.524827    | C2ORF37  | 2.814006    |
| AKR1C3   | 0.617817    | ATL3     | 1.406718    | C10ORF84  | 1.420229    | C2ORF64  | 0.636466    |
| AKT1S1   | 1.578531    | ATP13A1  | 1.496007    | C11ORF54  | 0.69112     | C2ORF68  | 0.526649    |
| ALDH1A3  | 0.657309    | ATP1B1   | 0.733385    | C11ORF57  | 1.451817    | C2ORF82  | 2.773965    |
| ALDOC    | 0.491504    | ATP5L    | 0.806702    | C11ORF75  | 0.644749    | C3ORF1   | 0.452014    |
| ALG1L    | 0.346398    | ATP6V1B1 | 1.895603    | C12ORF44  | 1.9078      | C3ORF10  | 0.430126    |
| ALPL     | 0.499451    | ATPBD1B  | 1.49821     | C12ORF76  | 0.577882    | C3ORF19  | 1.736321    |
| AMOT     | 0.567166    | ATRIP    | 1.585634    | C13ORF25  | 0.48334     | C3ORF58  | 0.568912    |
| ANGEL1   | 1.618432    | ATXN2    | 1.322884    | C13ORF34  | 1.3049      | C3ORF63  | 0.586924    |
| ANKHD1-  | 1.530376    | AUH      | 0.509428    | C14ORF124 | 0.34254     | C4ORF31  | 0.668713    |
| ANKRD1   | 8.32418     | AUTS2    | 0.646816    | C14ORF126 | 0.286153    | C4ORF49  | 0.524672    |
| ANKRD26  | 1.64055     | AXUD1    | 2.107915    | C14ORF132 | 0.620519    | C5ORF13  | 0.567786    |
| ANKRD43  | 0.633131    | B3GALNT2 | 2.03693     | C14ORF147 | 0.521529    | C5ORF21  | 0.737093    |
| ANKRD46  | 0.764499    | B3GALT6  | 0.701475    | C14ORF2   | 0.668548    | C5ORF41  | 1.78813     |
| ANKRD47  | 2.350186    | B3GALTL  | 0.507887    | C14ORF32  | 0.470897    | C5ORF5   | 1.97771     |
| ANKRD54  | 2.725137    | B9D1     | 0.628589    | C14ORF37  | 0.55312     | C5ORF51  | 1.350569    |
| ANKRD57  | 0.694718    | BAPX1    | 0.548013    | C14ORF79  | 2.60753     | C6ORF111 | 0.685148    |
| AP1S2    | 0.668466    | BAT5     | 1.511187    | C14ORF93  | 0.608094    | C6ORF117 | 0.536495    |
| AP3S1    | 0.534897    | BBS10    | 0.550494    | C15ORF23  | 0.478011    | C6ORF124 | 0.547975    |
| C6ORF130 | 0.630575    | CCNH     | 0.588365    | CLK1      | 1.949995    | DCAF16   | 0.602283    |
| C6ORF162 | 0.575501    | CCRK     | 1.723311    | CLN6      | 1.5503      | DCPIA    | 1.680696    |
| C6ORF52  | 2.823737    | CCRN4L   | 1.362913    | CMAS      | 0.625394    | DCP2     | 1.435504    |



| GENE     | FOLD CHANGE | GENE     | FOLD CHANGE | GENE     | FOLD CHANGE | GENE     | FOLD CHANGE |
|----------|-------------|----------|-------------|----------|-------------|----------|-------------|
| C6ORF64  | 0.552607    | CCT4     | 0.592406    | CNIH4    | 1.260059    | DDB2     | 2.455964    |
| C6ORF72  | 0.521022    | CCT5     | 0.734152    | CNOT10   | 1.379755    | DDTL     | 0.497385    |
| C6ORF85  | 0.591246    | CD19     | 0.535202    | CNOT3    | 1.919268    | DDX10    | 1.433616    |
| C7ORF40  | 2.668501    | CD46     | 0.508468    | CNPY3    | 0.571485    | DDX23    | 1.307363    |
| C7ORF63  | 3.15595     | CD58     | 0.508406    | CNTNAP2  | 0.686529    | DDX39    | 1.459288    |
| C9ORF102 | 1.677677    | CDC23    | 0.771392    | COG4     | 1.62857     | DDX51    | 2.052425    |
| C9ORF123 | 0.632665    | CDC25C   | 0.719622    | COL13A1  | 0.589547    | DDX56    | 1.473939    |
| C9ORF142 | 1.311945    | CDC42SE1 | 0.714017    | COL5A1   | 0.662915    | DEPDC6   | 0.476304    |
| C9ORF58  | 0.728109    | CDC5L    | 1.528963    | COMMD1   | 1.462526    | DEXI     | 0.59804     |
| C9ORF75  | 1.485273    | CDCA2    | 1.483393    | COPA     | 1.29658     | DFNA5    | 0.654241    |
| C9ORF86  | 1.371992    | CDS2     | 0.731777    | COPS7B   | 0.768617    | DHDH     | 1.64153     |
| C9ORF90  | 1.328337    | CELSR3   | 2.420456    | COQ10A   | 0.607801    | DHRS2    | 2.815501    |
| C9ORF98  | 2.319595    | CENPK    | 0.472205    | COQ3     | 0.761368    | DHX29    | 1.691183    |
| CA12     | 0.448296    | CENPT    | 1.463273    | COQ7     | 0.555459    | DIS3L2   | 1.936821    |
| CACNA2D3 | 2.166661    | CEP250   | 2.800675    | CORO1A   | 1.776072    | DKFZP686 | 0.472571    |
| CADM1    | 0.649042    | CEP350   | 1.491231    | CP110    | 1.370297    | DKK3     | 0.368502    |
| CAMK2N1  | 0.730165    | CEP70    | 0.660268    | CPE      | 0.625645    | DLD      | 0.480064    |
| CASC1    | 4.390188    | CGGBP1   | 1.081219    | CPLX1    | 2.338235    | DLST     | 2.269375    |
| CASC4    | 0.367054    | CGNL1    | 0.687615    | CPVL     | 0.553639    | DLX1     | 0.472438    |
| CASK     | 0.72287     | CHCHD6   | 1.442264    | CREG1    | 0.474797    | DMWD     | 2.066703    |
| CAV2     | 0.516536    | CHD1     | 1.458014    | CRIP2    | 1.868389    | DNAH1    | 1.774604    |
| CBL      | 1.710471    | CHD8     | 1.820413    | CRYZ     | 0.663774    | DNAJB2   | 2.236587    |
| CBR4     | 0.593676    | CHERP    | 1.628274    | CSPG5    | 0.576746    | DNAJC25  | 1.861884    |
| CCDC109B | 0.763315    | CHFR     | 1.362785    | CTDP1    | 1.690435    | DNASE1   | 1.787928    |
| CCDC110  | 0.633802    | CHMP1A   | 1.932658    | CTGLF3   | 1.720175    | DNASE2   | 0.607129    |
| CCDC16   | 0.65564     | CHST12   | 0.687896    | CTSC     | 0.661355    | DOCK11   | 0.595062    |
| CCDC45   | 1.537272    | CHST13   | 0.731548    | CTSL1    | 0.697624    | DOCK2    | 0.5539      |
| CCDC66   | 2.184493    | CHST15   | 0.738942    | CTSL2    | 0.631252    | DOHH     | 2.262024    |
| CCDC76   | 1.705059    | CHSY3    | 0.696894    | CTXN1    | 0.693749    | DPF1     | 1.858416    |
| CCDC81   | 2.105132    | CHURC1   | 0.473425    | CXCR7    | 0.44257     | DPP9     | 1.911881    |
| CCDC84   | 1.49162     | CISD2    | 0.606296    | CYP1B1   | 0.486747    | DPPA2    | 0.51045     |
| CCDC86   | 2.441578    | CIZ1     | 2.501085    | CYP26B1  | 0.504953    | DPYSL2   | 0.662593    |
| CCDC92   | 0.592145    | CKMT1A   | 1.366663    | CYP27B1  | 0.496069    | DPYSL3   | 0.734442    |
| CCDC93   | 1.643709    | CLCN6    | 2.042817    | CYP3A5   | 2.510812    | DRAP1    | 1.385436    |
| CCHCR1   | 1.574622    | CLCN7    | 1.360879    | CYP4V2   | 0.533607    | DRG2     | 1.705488    |
| CCNB1    | 0.664886    | CLDN12   | 0.638925    | DAPK3    | 3.233264    | DSCR6    | 0.636932    |
| CCND2    | 0.715093    | CLEC4A   | 1.938707    | DAXX     | 1.536893    | DSTYK    | 1.573678    |
| DUS3L    | 2.214824    | ETFDH    | 0.663428    | FGFBP1   | 0.356532    | GHR      | 0.53466     |
| DUSP14   | 1.475088    | ETV5     | 2.097342    | FKBP11   | 1.451644    | GLCE     | 0.536792    |
| DUSP5    | 2.287305    | EWSR1    | 1.24505     | FKBP15   | 1.787784    | GLI2     | 0.594422    |
| DUSP8    | 2.528717    | EXOC3    | 1.419449    | FLAD1    | 1.562036    | GLIPR2   | 0.720553    |
| DUT      | 0.628473    | EXOSC9   | 1.485968    | FLJ10996 | 1.932474    | GLTPD1   | 1.845348    |
| DVL2     | 1.505043    | EXTL2    | 0.621282    | FLJ12684 | 0.48117     | GMDS     | 0.701222    |
| DYNLRB2  | 3.050456    | F12      | 0.624572    | FLJ12949 | 1.534043    | GNA11    | 1.366573    |
| E2F5     | 0.455319    | FADS1    | 0.720107    | FLJ20254 | 1.57968     | GNG4     | 1.488706    |
| E2F7     | 1.553749    | FAM100B  | 1.638305    | FLJ20699 | 1.519543    | NGGT1    | 3.632056    |

| GENE       | FOLD CHANGE | GENE    | FOLD CHANGE | GENE     | FOLD CHANGE | GENE         | FOLD CHANGE |
|------------|-------------|---------|-------------|----------|-------------|--------------|-------------|
| E4F1       | 1.454523    | FAM105A | 0.601354    | FLJ22222 | 0.525444    | GNL2         | 1.387598    |
| EBPL       | 0.549404    | FAM111A | 1.490539    | FLJ22795 | 1.798417    | GNS          | 0.760744    |
| ECH1       | 0.690832    | FAM122B | 0.61617     | FLJ31568 | 3.062702    | GOLGB1       | 1.765122    |
| ECSIT      | 1.911805    | FAM133B | 1.636534    | FLJ36070 | 0.494271    | GOLSYN       | 0.538541    |
| EDA2R      | 2.230575    | FAM136A | 0.684116    | FMO4     | 0.60491     | GORASP1      | 1.501606    |
| EDC3       | 1.882379    | FAM13B  | 2.006295    | FNBP4    | 1.639547    | GPC3         | 0.416085    |
| EEA1       | 2.093785    | FAM158A | 2.488572    | FOXA1    | 0.625313    | GPC4         | 0.589511    |
| EEF1A1     | 0.919772    | FAM162B | 0.470448    | FOXC1    | 0.646203    | GPER         | 0.366541    |
| EFNB2      | 0.775993    | FAM174B | 0.465937    | FOXQ1    | 0.634412    | GPKOW        | 2.202312    |
| EFTUD1     | 1.595679    | FAM188B | 2.043956    | FRAG1    | 0.688163    | GPM6B        | 0.580409    |
| EFTUD2     | 1.32464     | FAM193A | 2.166015    | FRMD4A   | 0.511268    | GPR160       | 0.602603    |
| EIF2A      | 0.629862    | FAM27A  | 2.614315    | FTH1     | 0.650423    | GPR172A      | 1.783163    |
| EIF3B      | 1.291229    | FAM39E  | 1.370896    | FXC1     | 0.578511    | GPR37        | 0.452553    |
| EIF3D      | 1.4439      | FAM3A   | 1.629127    | FXR2     | 1.800094    | GPR64        | 0.563584    |
| EIF3J      | 0.58836     | FAM3C   | 0.434539    | FYCO1    | 0.725026    | GPS2         | 1.386234    |
| EIF4G3     | 1.42198     | FAM40A  | 1.625073    | FZD4     | 0.666153    | GRN          | 0.62206     |
| ELAC2      | 1.336368    | FAM73B  | 1.413266    | GABBR2   | 1.823239    | GRWD1        | 1.43184     |
| ELMOD1     | 0.44142     | FAM80B  | 3.753154    | GAD1     | 1.415783    | GSTA1        | 0.32194     |
| ENDOD1     | 0.658258    | FAM84B  | 0.535154    | GADD45B  | 1.670468    | GSTA4        | 0.679501    |
| ENO3       | 1.849094    | FAM98A  | 1.426336    | GADD45G  | 2.902838    | GSTM2        | 0.670848    |
| EPC1       | 1.529821    | FANCI   | 0.674161    | GALK1    | 0.782677    | GTF2F1       | 1.319513    |
| EPHA4      | 0.435988    | FARS2   | 1.334646    | GALNT12  | 0.574917    | GUSBL1       | 1.511526    |
| EPHB1      | 0.666656    | FARSA   | 1.926094    | GALR2    | 3.844585    | HADHA        | 0.668705    |
| ERAL1      | 1.38189     | FBRS    | 1.555545    | GAS1     | 0.414953    | HADHB        | 0.655517    |
| ERAP2      | 0.675102    | FBXL11  | 1.487263    | GAS8     | 2.335095    | HAS2AS       | 0.556512    |
| ERCC2      | 1.483063    | FBXL20  | 1.49095     | GBF1     | 1.669184    | HBEGF        | 1.711633    |
| ERCC3      | 1.320362    | FBXL21  | 0.581844    | GBGT1    | 0.559074    | HBQ1         | 0.51285     |
| ERF        | 1.410842    | FBXL6   | 2.42629     | GBP2     | 0.417074    | HCCA2        | 1.611028    |
| ERP29      | 0.667853    | FBXW4   | 1.521124    | GCA      | 0.608757    | HCFC1        | 0.603492    |
| ERRFI1     | 0.643998    | FDX1L   | 1.783172    | GCAT     | 1.624292    | HCFC2        | 2.200684    |
| ESD        | 0.610381    | FGD3    | 0.508315    | GGT7     | 1.919797    | HDHD1A       | 0.644578    |
| HELZ       | 1.437119    | IGSF3   | 0.770882    | KCTD20   | 0.749811    | LINCR        | 3.440799    |
| HESX1      | 0.473236    | IGSF5   | 0.516802    | KDM5B    | 1.657634    | LIPA         | 0.478548    |
| HEY1       | 0.464445    | IL28RA  | 1.43864     | KDM6B    | 1.842935    | LITAF        | 0.462146    |
| HEY2       | 1.509004    | IL32    | 5.74988     | KIAA0133 | 1.375401    | LMBRD1       | 0.513758    |
| HGS        | 1.327428    | ILKAP   | 2.423556    | KIAA0194 | 1.537265    | LMF2         | 1.59457     |
| HIST1H1C   | 2.219726    | IMPA2   | 0.549209    | KIAA0240 | 0.615361    | LMNB2        | 1.312919    |
| HIST1H2AM  | 2.239455    | INO80   | 1.872553    | KIAA0367 | 0.513271    | LMTK2        | 1.8806      |
| HIST1H4H   | 7.353714    | INO80D  | 1.62208     | KIAA0562 | 1.417314    | LOC100128252 | 0.606457    |
| HIST1H4K   | 3.565747    | INPP5E  | 1.742749    | KIAA0586 | 1.646999    | LOC100128274 | 2.791503    |
| HIST2H2AA4 | 2.165785    | INPP5K  | 1.500102    | KIAA0753 | 2.161771    | LOC100128805 | 1.633569    |
| HIST2H2AC  | 2.25678     | INSIG2  | 0.697945    | KIAA0907 | 1.361119    | LOC100129028 | 1.484395    |
| HKR1       | 1.325407    | INTS8   | 1.573714    | KIAA0913 | 1.496151    | LOC100129637 | 1.739444    |
| HLA-DMB    | 0.721075    | IP6K1   | 1.443672    | KIAA1285 | 1.548919    | LOC100130886 | 0.705399    |
| HLA-DPA1   | 0.391707    | IPO13   | 1.906653    | KIAA1429 | 1.491355    | LOC100131205 | 0.393905    |
| HLA-DRB1   | 0.564605    | IPO8    | 0.624202    | KIAA1467 | 0.621426    | LOC100131609 | 0.554123    |

| GENE      | FOLD CHANGE | GENE      | FOLD CHANGE | GENE     | FOLD CHANGE | GENE         | FOLD CHANGE |
|-----------|-------------|-----------|-------------|----------|-------------|--------------|-------------|
| HMGN4     | 0.583111    | IQCC      | 1.998744    | KIAA1683 | 2.124963    | LOC100132112 | 2.12007     |
| HMHA1     | 0.588091    | IQCK      | 1.719204    | KIAA1688 | 1.763008    | LOC100132299 | 0.666789    |
| HMOX1     | 1.787614    | IRAK2     | 1.678422    | KIAA1731 | 3.078803    | LOC100132418 | 1.706062    |
| HNRNPA1   | 0.430211    | IRS2      | 0.449895    | KIF24    | 2.1473      | LOC100132442 | 0.385049    |
| HNRPA1L-2 | 0.708533    | IRX3      | 0.688911    | KIF2C    | 1.294545    | LOC100132457 | 1.555875    |
| HNRPA1P4  | 0.726899    | IRX4      | 0.627465    | KIF7     | 1.774129    | LOC100132564 | 7.190289    |
| HNRPDL    | 1.193824    | IRX6      | 1.606796    | KIT      | 0.546363    | LOC100132774 | 1.963326    |
| HOXB8     | 0.601496    | ISG15     | 2.61837     | KLF13    | 0.645203    | LOC100133012 | 0.522178    |
| HP1BP3    | 1.506239    | ISG20L1   | 2.194036    | KLF9     | 0.588001    | LOC100133372 | 0.509126    |
| HPRT1     | 0.6529      | ISL1      | 0.664507    | KLHL18   | 1.604039    | LOC100133489 | 0.509144    |
| HRAS      | 1.471732    | ISOC1     | 0.645349    | KLHL28   | 2.683914    | LOC100133866 | 1.799959    |
| HSBP1     | 0.528112    | ITGAV     | 0.619936    | KPNA1    | 1.551411    | LOC100134108 | 1.792875    |
| HSD17B6   | 0.365109    | IVD       | 1.440399    | KPNA4    | 1.586982    | LOC100134134 | 0.744554    |
| HSD17B8   | 0.645334    | IWS1      | 1.651962    | KRCC1    | 1.442211    | LOC100134304 | 0.656216    |
| HSPB8     | 1.623281    | JAKMIP2   | 0.617354    | KRI1     | 1.714236    | LOC100134364 | 1.441668    |
| HSPBL2    | 0.702746    | JARID1A   | 1.5711      | LACTB2   | 0.460349    | LOC144438    | 1.4921      |
| IARS2     | 0.687828    | JHDM1D    | 2.901421    | LAMC3    | 0.591391    | LOC196752    | 1.951707    |
| ID2       | 0.649242    | JMJD1A    | 1.928174    | LANCL1   | 0.633911    | LOC257396    | 0.457961    |
| IER3      | 2.435408    | JMJD2C    | 1.823865    | LARP7    | 0.650737    | LOC285908    | 2.484783    |
| IER5L     | 3.676952    | JUNB      | 1.87051     | LEMD2    | 1.317535    | LOC286208    | 2.485033    |
| IFI30     | 1.517129    | KAL1      | 0.557853    | LGI2     | 0.576897    | LOC387882    | 0.668762    |
| IFI35     | 0.674457    | KBTBD8    | 1.976402    | LHPP     | 0.564549    | LOC388275    | 0.594542    |
| IFIT2     | 3.6234      | KCNJ8     | 0.718002    | LHX2     | 0.769839    | LOC388339    | 1.486259    |
| IFT74     | 1.684502    | KCNK12    | 2.73258     | LIME1    | 1.759477    | LOC388789    | 0.659408    |
| IGFBP5    | 0.423895    | KCNMB4    | 0.747103    | LIN37    | 2.796925    | LOC388796    | 3.222598    |
| LOC389156 | 0.365518    | LOC650803 | 1.424483    | LRRC3    | 0.522559    | MKI67        | 1.526061    |
| LOC399491 | 2.101416    | LOC651149 | 0.482854    | LRRC42   | 0.501652    | MKX          | 0.568641    |
| LOC400027 | 0.702357    | LOC651816 | 1.397898    | LTA      | 2.442293    | MLL          | 1.842015    |
| LOC401152 | 0.544216    | LOC653156 | 0.37231     | LTA4H    | 0.724283    | MMD          | 0.723756    |
| LOC401317 | 2.225312    | LOC653171 | 0.553252    | LTBP2    | 0.441152    | MOBKL2B      | 0.584672    |
| LOC401397 | 0.511822    | LOC653344 | 1.7901      | LTBR     | 1.385414    | MORF4L1      | 0.499784    |
| LOC401640 | 0.512936    | LOC653610 | 2.212405    | LXN      | 0.558148    | MORG1        | 1.418072    |
| LOC402221 | 0.647847    | LOC727820 | 2.238738    | LYG1     | 2.4697      | MPP3         | 1.556841    |
| LOC439949 | 0.574018    | LOC728153 | 1.699024    | LZTFL1   | 1.436195    | MPP6         | 0.613993    |
| LOC440354 | 3.74157     | LOC728308 | 2.022071    | MAD1L1   | 2.568147    | MRPL10       | 1.840231    |
| LOC440928 | 0.574572    | LOC728417 | 2.129579    | MAF1     | 1.400931    | MRPL12       | 1.258646    |
| LOC441511 | 0.406131    | LOC728640 | 1.580736    | MAGOHB   | 0.509783    | MRPL21       | 1.094569    |
| LOC441642 | 0.591579    | LOC728643 | 0.417828    | MAL2     | 0.606453    | MRPL38       | 1.458246    |
| LOC441876 | 0.759792    | LOC728661 | 0.75893     | MAOA     | 0.626184    | MRPS15       | 1.281546    |
| LOC442582 | 0.533607    | LOC728741 | 2.64831     | MAP1S    | 1.581289    | MRPS2        | 1.430535    |
| LOC493869 | 0.72112     | LOC728820 | 0.752857    | MAP2K2   | 1.779221    | MRPS27       | 0.671561    |
| LOC641849 | 0.326562    | LOC728823 | 1.553641    | MAP3K1   | 1.43825     | MRPS5        | 1.306663    |
| LOC642590 | 0.714751    | LOC728908 | 1.6042      | MAP3K11  | 1.629348    | MTCH2        | 0.606467    |
| LOC642826 | 3.166244    | LOC729102 | 0.776851    | MAP3K9   | 2.34105     | MTHFD2L      | 2.072323    |
| LOC642934 | 0.718439    | LOC729148 | 0.699451    | MAP7D2   | 0.598711    | MTHFR        | 1.809215    |
| LOC643007 | 0.661588    | LOC729421 | 0.549204    | MAPK13   | 0.619819    | MTIF3        | 0.619655    |

| GENE      | FOLD CHANGE | GENE      | FOLD CHANGE | GENE     | FOLD CHANGE | GENE     | FOLD CHANGE |
|-----------|-------------|-----------|-------------|----------|-------------|----------|-------------|
| LOC643201 | 2.709609    | LOC729608 | 1.299458    | MCCC1    | 1.370606    | MTRFIL   | 1.555912    |
| LOC644033 | 1.486373    | LOC730153 | 2.117907    | MCL1     | 1.507677    | MUC16    | 4.998588    |
| LOC644132 | 1.858754    | LOC730173 | 1.823567    | MCM2     | 1.567329    | MUM1     | 0.769184    |
| LOC644879 | 1.594988    | LOC730246 | 0.773362    | MCM5     | 2.281943    | MURC     | 2.183013    |
| LOC644928 | 1.617436    | LOC730256 | 2.109903    | MDM4     | 0.440064    | MUS81    | 1.742258    |
| LOC645385 | 0.654099    | LOC731314 | 1.387617    | MEA1     | 1.759348    | MYBBP1A  | 1.986199    |
| LOC645436 | 0.517202    | LOC731797 | 0.414758    | MED14    | 0.694291    | MYC      | 0.310825    |
| LOC645937 | 1.689481    | LOC731950 | 1.576763    | MED4     | 0.717791    | MYCBP2   | 1.588026    |
| LOC645968 | 0.523999    | LOC732432 | 0.463795    | METAP2   | 0.730529    | MYH3     | 2.393872    |
| LOC646332 | 2.933125    | LOC81691  | 1.458091    | METTL4   | 0.578015    | MYL5     | 1.516999    |
| LOC646347 | 0.704743    | LOC88523  | 1.722571    | METTL5   | 0.564554    | MYO3A    | 1.913228    |
| LOC646576 | 0.391364    | LOC92497  | 1.686935    | MFSD3    | 0.569149    | NAB2     | 1.410995    |
| LOC646786 | 1.992027    | LPAR3     | 0.443546    | MGC16169 | 1.658559    | NADSYN1  | 1.36938     |
| LOC647349 | 0.399789    | LPL       | 0.725003    | MGC16703 | 1.249777    | NAIF1    | 2.115981    |
| LOC648210 | 0.490154    | LPPR2     | 1.648397    | MGC3020  | 1.526591    | NAPB     | 1.383741    |
| LOC648984 | 1.987215    | LPXN      | 2.173012    | MGC52000 | 1.994033    | NAPG     | 1.457612    |
| LOC649839 | 1.939873    | LRIG2     | 1.722567    | MGMT     | 0.682238    | NARFL    | 1.682377    |
| LOC650029 | 1.67466     | LRIG3     | 0.518663    | MICALL1  | 1.682829    | NAT10    | 1.326421    |
| LOC650298 | 1.508364    | LRP5L     | 3.706272    | MIRLET7D | 0.42192     | NCAPD3   | 1.300616    |
| NCAPG     | 1.367319    | NUP214    | 1.961623    | PDX1     | 1.81116     | PPAN     | 1.698934    |
| NCKAP1    | 0.446588    | NUP37     | 0.635217    | PDXDC1   | 0.698987    | PPAP2A   | 0.693017    |
| NCOA5     | 1.612944    | OAZ2      | 1.447161    | PEA15    | 1.4769      | PPIA     | 0.527531    |
| NDUFB9    | 1.288156    | ODF2      | 1.442259    | PECR     | 0.727763    | PPIC     | 0.56449     |
| NEK11     | 2.231478    | OFD1      | 1.913966    | PELP1    | 2.026943    | PPP1CB   | 0.516429    |
| NEK2      | 1.366881    | OIP5      | 0.557956    | PEX14    | 1.731047    | PPP1R12C | 2.075874    |
| NELF      | 1.448877    | OKL38     | 3.623806    | PGBD5    | 1.741494    | PPP1R14C | 0.66949     |
| NELL2     | 0.700182    | OSAP      | 0.619581    | PGD      | 0.781266    | PPP1R15A | 2.162491    |
| NETO2     | 0.657455    | OSBPL1A   | 0.656703    | PGS1     | 1.448716    | PPP2R5B  | 2.268868    |
| NEU1      | 1.578082    | OSGEPL1   | 0.425931    | PHC3     | 1.894499    | PPP3CB   | 0.610261    |
| NEUROG2   | 0.650746    | OVGP1     | 3.383078    | PHF21B   | 4.535304    | PPPDE1   | 0.761485    |
| NEXN      | 2.025849    | OXR1      | 0.732317    | PHIP     | 1.711606    | PPRC1    | 1.545904    |
| NFKB1     | 1.807571    | OXSR1     | 1.379797    | PHLDA3   | 2.199798    | PQLC3    | 0.690366    |
| NFKBIA    | 1.286472    | OXTR      | 1.336925    | PIAS3    | 1.563056    | PRCP     | 0.729331    |
| NFKBIB    | 2.691425    | PA2G4     | 1.358544    | PIGF     | 0.517208    | PRDM10   | 0.529069    |
| NFKBIL2   | 2.250907    | PACSIN1   | 0.656573    | PIGV     | 0.67615     | PRDX6    | 0.670402    |
| NFRKB     | 1.706325    | PAF1      | 1.436774    | PIGY     | 0.620511    | PRKAB1   | 1.520015    |
| NHP2L1    | 0.621167    | PAFAH1B1  | 0.558365    | PIK3IP1  | 2.756854    | PRKCABP  | 1.592081    |
| NIF3L1    | 0.653868    | PAFAH1B3  | 0.644289    | PIK3R4   | 1.394981    | PRKCH    | 0.720208    |
| NKD2      | 1.670086    | PAM       | 0.769178    | PIP4K2A  | 0.721969    | PRKRIP1  | 1.595104    |
| NKTR      | 1.482431    | PAPD5     | 1.369272    | PIR      | 0.575784    | PRMT10   | 1.616779    |
| NLE1      | 2.055714    | PAQR8     | 0.587375    | PISD     | 1.401983    | PROS1    | 0.743147    |
| NOC2L     | 1.637139    | PARM1     | 0.665399    | PLA2G4C  | 9.909851    | PRPF19   | 1.347475    |
| NOC3L     | 1.499519    | PARP6     | 2.117924    | PLA2G7   | 0.353809    | PRPF3    | 1.453293    |
| NOL6      | 1.559265    | PATL1     | 1.367563    | PLAC8L1  | 2.079184    | PRR4     | 4.038555    |
| NOL8      | 1.355428    | PAX6      | 0.538198    | PLD6     | 2.010165    | PRR7     | 1.796886    |
| NOP14     | 1.427678    | PBK       | 0.640708    | PLEKHF1  | 1.401021    | PRRG1    | 0.660595    |

| GENE     | FOLD CHANGE | GENE          | FOLD CHANGE | GENE     | FOLD CHANGE | GENE     | FOLD CHANGE |
|----------|-------------|---------------|-------------|----------|-------------|----------|-------------|
| NOP2     | 1.428566    | PBX3          | 0.647446    | PLEKHM2  | 1.969477    | PRRG2    | 0.522795    |
| NPIP     | 1.722996    | PBX4          | 1.919902    | PLS1     | 0.675394    | PRRX2    | 0.70185     |
| NPY      | 0.484033    | PCGF1         | 2.058911    | PLSCR3   | 0.643035    | PRSS16   | 0.516173    |
| NR1H3    | 2.029132    | PCMT1         | 0.75387     | PMS2L3   | 2.408704    | PRSS23   | 0.511874    |
| NR2F1    | 0.599125    | PCMTD2        | 0.66596     | PNMA2    | 0.642966    | PRSS8    | 0.35762     |
| NSUN6    | 1.585816    | PCOLCE2       | 0.55933     | POFUT2   | 1.928212    | PSAP     | 0.776054    |
| NT5C2    | 1.552747    | PCSK1N        | 0.59688     | POLA2    | 1.277775    | PSEN2    | 1.477739    |
| NUBP1    | 0.601414    | PCSK7         | 1.580344    | POLE     | 1.511246    | PSMD3    | 1.757958    |
| NUCB1    | 0.784487    | PDCD2L        | 1.365747    | POLM     | 2.300695    | PTBP2    | 1.776606    |
| NUDT11   | 0.686473    | PDGFD         | 0.514107    | POLR2A   | 1.539453    | PTCD2    | 1.330105    |
| NUDT16   | 0.546196    | PDGFRL        | 0.681412    | POLR3A   | 1.800054    | PTCH1    | 0.438583    |
| NUDT16L1 | 1.732993    | PDHB          | 0.619454    | POLR3D   | 1.708613    | PTDSS2   | 1.701543    |
| NUDT7    | 0.590328    | PDIA6         | 0.633673    | PON2     | 0.547596    | PTGER1   | 0.484542    |
| PTGER2   | 0.39034     | RHBDD2        | 2.399513    | RRN3     | 1.720919    | SETD2    | 1.711178    |
| PUSL1    | 1.826275    | RHBDD3        | 2.344917    | RRP1     | 1.936495    | SETD8    | 1.544776    |
| PVRL4    | 2.720911    | RHBDL3        | 0.627178    | RRP12    | 2.91339     | SETX     | 2.087393    |
| PYCR2    | 1.321876    | RHOT2         | 1.856525    | RRP7A    | 1.496766    | SF4      | 1.525127    |
| PYGB     | 1.635777    | RIC8B         | 1.381082    | RSC1A1   | 1.649713    | SFRP1    | 0.707334    |
| QARS     | 0.751097    | RLF           | 1.568608    | RSHL3    | 2.564781    | SFRS12   | 1.547123    |
| QPRT     | 0.740909    | RN5S9         | 2.381664    | RSPH3    | 1.348531    | SFRS15   | 1.371187    |
| QTRT1    | 1.649737    | RNF10         | 1.499589    | RSRC2    | 1.899226    | SFRS16   | 2.568433    |
| RAB10    | 0.638302    | RNF121        | 1.385695    | RTN4IP1  | 0.643549    | SFRS17A  | 1.416167    |
| RAB11A   | 0.71329     | RNF145        | 0.449837    | RUFY1    | 1.787593    | SFRS4    | 1.330607    |
| RAB36    | 1.442233    | RNF169        | 1.933091    | RUSC2    | 1.960358    | SFRS8    | 1.734089    |
| RAB6B    | 0.603801    | RNF25         | 3.063573    | S100A4   | 0.339569    | SFXN1    | 0.661014    |
| RAB7L1   | 0.540018    | RNF5P1        | 0.527336    | SAC3D1   | 1.343258    | SGK1     | 0.611934    |
| RAB9B    | 0.602144    | RNMT          | 0.725566    | SAFB     | 1.386667    | SH2B3    | 0.707156    |
| RAD23B   | 0.610291    | RNU1-3        | 4.704136    | SAFB2    | 1.887179    | SH3BP5L  | 2.390083    |
| RAD9A    | 1.731587    | RNU1-5        | 3.910265    | SAMD5    | 0.642081    | SHARPIN  | 1.814249    |
| RAGE     | 1.927727    | RNU1A3        | 3.14427     | SAMD9    | 0.611498    | SIAH2    | 0.573507    |
| RALA     | 0.712642    | RNU1F1        | 2.603112    | SAP18    | 0.569948    | SIGMAR1  | 1.447468    |
| RALB     | 0.755952    | RNU1G2        | 4.704983    | SAPS1    | 1.413285    | SIRT1    | 1.338698    |
| RALGAPB  | 1.649335    | RNU6-1        | 2.012903    | SAT2     | 1.320696    | SIX1     | 0.68283     |
| RAP2A    | 0.628372    | RNU6-15       | 2.030369    | SBDS     | 3.281936    | SIX5     | 0.705349    |
| RAPGEF6  | 1.690295    | RNU6ATAC      | 3.434213    | SCAMP2   | 1.95679     | SKAP2    | 0.512355    |
| RASSF1   | 3.431152    | RNU86         | 5.522851    | SCHIP1   | 0.703505    | SLC12A4  | 2.318422    |
| RASSF7   | 1.309394    | RNY1          | 2.335576    | SCOC     | 0.596394    | SLC19A1  | 1.404782    |
| RBBP9    | 0.510045    | RNY4          | 9.847384    | SCYL1    | 1.231546    | SLC1A3   | 1.816631    |
| RBKS     | 2.384219    | RP11-529I10.4 | 1.635376    | SDCCAG8  | 1.53268     | SLC22A15 | 1.769267    |
| RBL2     | 0.600561    | RP9P          | 1.892414    | SDHAP2   | 1.569973    | SLC30A7  | 1.709059    |
| RBM15    | 1.469374    | RPA4          | 2.2545      | SDHD     | 0.698239    | SLC35A5  | 0.522042    |
| RBM17    | 0.714041    | RPAP1         | 2.72895     | SEC22A   | 1.273703    | SLC35B4  | 0.710933    |
| RBM38    | 1.663764    | RPF2          | 1.254763    | SEC62    | 0.665171    | SLC35D3  | 0.432721    |
| RBM42    | 2.007018    | RPL13A        | 0.614286    | SELENBP1 | 0.689808    | SLC36A4  | 1.932892    |
| RBM6     | 1.334168    | RPL15         | 0.619332    | SELM     | 1.330965    | SLC37A4  | 0.72596     |
| RBMS2    | 1.441779    | RPL22         | 0.460995    | SELO     | 1.555869    | SLC38A2  | 0.625865    |

| GENE     | FOLD CHANGE | GENE       | FOLD CHANGE | GENE      | FOLD CHANGE | GENE     | FOLD CHANGE |
|----------|-------------|------------|-------------|-----------|-------------|----------|-------------|
| RBMX     | 0.707762    | RPL7A      | 0.764916    | SEMA3A    | 0.349381    | SLC3A2   | 2.286919    |
| RC3H2    | 1.80394     | RPN2       | 1.580817    | SEMA6A    | 0.653214    | SLC44A1  | 0.756781    |
| RDH13    | 1.93029     | RPS12      | 0.711977    | SEPW1     | 1.422866    | SLC47A1  | 0.592914    |
| RECQL4   | 1.762142    | RPS23      | 0.664122    | SERPINB1  | 0.526028    | SLCO4C1  | 0.533323    |
| REEP5    | 0.693837    | RPS26L     | 1.347589    | SERPINE2  | 0.71716     | SLIT2    | 0.568608    |
| RFWD3    | 1.648038    | RPS6KA4    | 1.585228    | SERTAD1   | 2.665969    | SLITRK5  | 0.477888    |
| RFX7     | 0.690276    | RPUSD4     | 0.725226    | SETD1A    | 1.338584    | SMPD2    | 2.030161    |
| SMS      | 0.665245    | ST6GALNAC6 | 1.603308    | TMED4     | 0.686012    | TRMT61A  | 3.367321    |
| SMYD4    | 1.82649     | STAG1      | 1.445502    | TMED7     | 0.583515    | TRMU     | 2.445397    |
| SNAPC4   | 1.746439    | STK11IP    | 1.995264    | TMEFF2    | 0.611426    | TRNAU1AP | 0.524434    |
| SNCA     | 0.456328    | STK35      | 1.706123    | TMEM101   | 1.332996    | TSHZ1    | 0.44864     |
| SNHG12   | 5.90251     | STK36      | 1.479917    | TMEM11    | 1.418095    | TSHZ3    | 0.507443    |
| SNHG6    | 1.60706     | STRADB     | 0.678091    | TMEM117   | 0.666677    | TSPAN3   | 0.647955    |
| SNORA10  | 1.449241    | STRN3      | 0.609675    | TMEM123   | 0.640744    | TSPAN5   | 0.616689    |
| SNORA76  | 0.621701    | STS-1      | 0.635589    | TMEM194   | 1.292186    | TSPAN7   | 0.56403     |
| SNORD13  | 2.32216     | STX1A      | 3.205996    | TMEM198   | 3.041822    | TSR2     | 1.463732    |
| SNORD14A | 0.606824    | STX3       | 1.313373    | TMEM206   | 0.684805    | TSSC4    | 1.439874    |
| SNORD31  | 0.475899    | SUCLA2     | 0.550842    | TMEM214   | 1.786968    | TSTA3    | 1.931261    |
| SNORD3A  | 2.284414    | SUCLG2     | 0.716217    | TMEM222   | 1.800096    | TTC25    | 1.852716    |
| SNORD3C  | 3.054952    | SUMO2      | 0.459057    | TMEM35    | 0.549476    | TTC31    | 0.659301    |
| SNORD3D  | 3.70108     | SUMO3      | 0.66268     | TMEM41B   | 0.777819    | TTC32    | 0.701464    |
| SNORD55  | 2.554099    | SUPT5H     | 1.720498    | TMEM52    | 0.498973    | TTC38    | 1.580782    |
| SNTB1    | 0.710682    | SUPT6H     | 1.787185    | TMEM59    | 0.751992    | TTL5     | 1.429938    |
| SNUPN    | 0.591322    | SURF2      | 1.73562     | TMEM62    | 1.733836    | TTL7     | 3.074307    |
| SNX4     | 0.64535     | SURF6      | 1.473829    | TMEM90B   | 0.364559    | TUBB     | 0.62128     |
| SOX2     | 0.527592    | SUSD3      | 0.471205    | TMSB15A   | 0.513611    | TUBB2B   | 0.749189    |
| SOX9     | 0.677152    | TAF10      | 1.409894    | TMX3      | 0.590393    | TUFT1    | 1.645002    |
| SPAG7    | 0.654007    | TAF5       | 0.74793     | TNFAIP3   | 9.464084    | TUSC2    | 1.6215      |
| SPATA2L  | 1.932527    | TAF9L      | 0.540435    | TNFRSF12A | 2.461582    | TWIST1   | 0.755652    |
| SPINK2   | 0.424122    | TAP1       | 1.300362    | TNIP1     | 1.537438    | TXNDC15  | 0.599193    |
| SPINK5   | 2.084763    | TAPT1      | 1.874492    | TNPO2     | 1.375042    | TXNL4B   | 2.543607    |
| SPON1    | 0.594311    | TATDN2     | 1.417321    | TOM1L1    | 0.526343    | TYW1B    | 1.645455    |
| SPRY1    | 0.552863    | TBC1D22B   | 1.789916    | TOP3B     | 1.630439    | U2AF1L2  | 1.867539    |
| SPRYD4   | 0.541042    | TBL3       | 1.847235    | TOPBP1    | 1.483314    | UAP1L1   | 2.93623     |
| SPTLC2   | 0.527134    | TDG        | 1.340274    | TOR1AIP2  | 1.896146    | UBA6     | 1.47313     |
| SQSTM1   | 1.684961    | TEX15      | 0.661472    | TP53BP1   | 1.443503    | UBAP2    | 1.917633    |
| SRI      | 0.560342    | TFPT       | 1.533055    | TPX2      | 1.279272    | UBE2J1   | 0.724342    |
| SRM      | 1.811383    | TGFBR3     | 0.742276    | TRAFD1    | 1.928192    | UBE2N    | 0.547408    |
| SRPX     | 0.437762    | THADA      | 2.109544    | TRIB1     | 0.585286    | UBL3     | 0.680444    |
| SRRM1    | 1.31728     | THEM2      | 0.727146    | TRIM11    | 1.481113    | UBQLN4   | 1.465548    |
| SSBP2    | 0.653388    | THOP1      | 2.028412    | TRIM26    | 1.953049    | UBR2     | 1.920508    |
| SSH2     | 1.643538    | THUMPD2    | 2.012158    | TRIM28    | 1.420569    | UBR5     | 1.651336    |
| SSR1     | 0.664453    | TIMM44     | 1.550721    | TRIM45    | 0.610226    | UCRC     | 0.558274    |
| SSX2IP   | 0.617741    | TIMP3      | 0.582857    | TRIM47    | 2.330327    | UFSP1    | 1.672673    |
| ST13     | 0.768317    | TJAP1      | 1.315854    | TRIP11    | 1.709565    | UIMC1    | 1.628987    |
| ST3GAL2  | 0.730287    | TLE1       | 0.736168    | TRIT1     | 2.861232    | UMPS     | 0.377504    |

| GENE    | FOLD CHANGE | GENE    | FOLD CHANGE | GENE    | FOLD CHANGE | GENE    | FOLD CHANGE |
|---------|-------------|---------|-------------|---------|-------------|---------|-------------|
| ST3GAL6 | 0.658982    | TLE4    | 0.562466    | TRMT1   | 1.471494    | UNC84A  | 0.690427    |
| UPLP    | 1.260867    | ZFAND2A | 1.618728    | ZNF57   | 2.604265    | USP39   | 1.662061    |
| USO1    | 0.62023     | ZFAND3  | 1.99262     | ZNF579  | 1.523326    | USP5    | 1.286221    |
| UST     | 0.685135    | ZMAT3   | 2.009283    | ZNF707  | 1.583152    | XPC     | 1.394685    |
| UVRAG   | 1.683306    | ZMIZ1   | 0.694675    | ZNF721  | 2.229187    | XRCC1   | 1.413745    |
| VASN    | 1.650987    | ZNF140  | 2.046358    | ZNF764  | 2.158272    | XRCC3   | 1.792883    |
| VGF     | 2.887397    | ZNF148  | 1.31221     | ZNF767  | 2.457453    | XRCC5   | 0.593159    |
| VPS18   | 1.741878    | ZNF165  | 1.567898    | ZNF773  | 2.105024    | YEATS4  | 0.529247    |
| VPS33A  | 0.567015    | ZNF202  | 1.730452    | ZNF777  | 1.421824    | ZADH2   | 0.65514     |
| VPS33B  | 1.493006    | ZNF205  | 1.697957    | ZNF783  | 1.785127    | ZBTB17  | 2.120927    |
| VPS37B  | 1.884272    | ZNF211  | 1.738662    | ZNF787  | 1.64261     | ZBTB22  | 0.579712    |
| WARS2   | 0.63884     | ZNF213  | 1.586769    | ZNF79   | 4.006687    | ZBTB42  | 0.601997    |
| WASF2   | 1.747912    | ZNF25   | 0.392197    | ZNF791  | 1.883901    | ZBTB43  | 1.844487    |
| WASH2P  | 2.074583    | ZNF250  | 1.834842    | ZNF821  | 1.305265    | ZBTB46  | 2.16424     |
| WBSCR22 | 1.448464    | ZNF256  | 1.792453    | ZNF845  | 1.882445    | ZBTB48  | 1.758466    |
| WDR25   | 2.33665     | ZNF26   | 1.351611    | ZNHIT2  | 1.90252     | ZBTB5   | 0.671512    |
| WDR41   | 0.606265    | ZNF277  | 0.691786    | ZNRF3   | 0.545048    | ZC3H18  | 1.7459      |
| WDR55   | 1.532463    | ZNF282  | 1.687195    | ZP3     | 2.119617    | ZC3H3   | 1.52804     |
| WDR60   | 1.540387    | ZNF296  | 2.018435    | ZRSR2   | 2.87585     | ZDHHC18 | 1.475063    |
| WDR62   | 2.362981    | ZNF304  | 1.676241    | ZSCAN12 | 2.493271    | ZFP36   | 1.558652    |
| WDR79   | 1.36084     | ZNF317  | 1.545945    | ZSCAN21 | 1.329037    | ZFP82   | 1.534037    |
| WHAMM   | 2.659794    | ZNF32   | 0.513408    | ZZZ3    | 1.523812    | ZNF343  | 1.504112    |
| ZNF35   | 1.378232    | WNT5A   | 0.44706     | WNT5A   | 0.44706     | ZNF416  | 1.595944    |
| ZFPM1   | 1.548313    | ZNF364  | 1.370786    | ZNF364  | 1.370786    | ZNF419  | 1.546236    |
| ZNF324  | 2.175526    | ZNF383  | 1.988769    | ZNF383  | 1.988769    | ZNF426  | 1.524803    |
| ZNF431  | 2.044255    | ZNF433  | 2.042966    | ZNF444  | 1.595615    | ZNF446  | 1.42368     |
| ZNF470  | 1.87809     | ZNF480  | 1.542453    | ZNF500  | 1.432364    | ZNF557  | 1.5631      |
| ZNF598  | 1.326032    | ZNF627  | 1.443742    | ZNF630  | 1.601751    | ZNF696  | 1.571802    |

**Supplementary Table S3:** The list of 428 differentially expressed genes after depletion of hsa-miR-195 in MCF7 cells

| GENE         | FOLD CHANGE | GENE      | FOLD CHANGE | GENE          | FOLD CHANGE | GENE         | FOLD CHANGE |
|--------------|-------------|-----------|-------------|---------------|-------------|--------------|-------------|
| AEN          | 1.677893    | C20ORF111 | 1.337153    | CXORF39       | 2.337974    | GTF3C5       | 1.358446    |
| AKR1C3       | 0.690353    | C20ORF52  | 1.384663    | CYP27B1       | 0.689505    | HAVCR2       | 0.330279    |
| ALPL         | 0.621651    | C21ORF122 | 0.51669     | CYP4V2        | 0.585563    | HESX1        | 0.386351    |
| ANGEL1       | 1.461615    | C4ORF49   | 0.607578    | DAPK3         | 2.019278    | HIST1H2AC    | 0.494899    |
| ANKRD1       | 9.156219    | C6ORF129  | 1.313886    | DCP2          | 1.559785    | HIST1H4K     | 2.090867    |
| ANKRD54      | 1.487245    | C6ORF130  | 0.734589    | DDB2          | 1.662713    | HIST3H2A     | 0.690726    |
| APBA3        | 1.374231    | C6ORF160  | 1.50088     | DDX39         | 1.211225    | HJURP        | 1.441844    |
| ARC          | 1.816252    | C6ORF173  | 1.60675     | DKFZP686K1684 | 0.636709    | HLA-E        | 1.433855    |
| ARF3         | 1.582442    | C7ORF40   | 1.82021     | DNTTIP1       | 1.297843    | HSD17B6      | 0.614904    |
| ARMC1        | 1.32901     | C7ORF47   | 1.312705    | DPP9          | 1.380227    | HSPB8        | 1.709626    |
| ASGR1        | 0.586126    | C8ORF59   | 1.613759    | DUS3L         | 1.463481    | HTRA1        | 0.698507    |
| ATAD2        | 1.428275    | CBR4      | 0.676108    | DUSP5         | 1.449689    | IER3         | 2.115312    |
| ATAD3A       | 1.487463    | CCDC110   | 0.526746    | DYNLL2        | 1.389282    | IGSF5        | 0.412783    |
| ATL3         | 1.435411    | CCDC72    | 1.378639    | E2F5          | 0.679776    | IL32         | 5.49949     |
| ATP5G1       | 1.54823     | CCDC86    | 1.433949    | ECT2          | 1.568842    | IL8          | 5.982008    |
| ATP5J2       | 1.348867    | CCDC92    | 0.659714    | EDC3          | 1.52483     | IRF1         | 1.53213     |
| AURKAIP1     | 1.346425    | CCL2      | 2.080626    | EIF2S1        | 1.443871    | ISG20L1      | 1.740436    |
| AVL9         | 1.581566    | CCT5      | 0.607402    | EIF3A         | 1.691591    | KIAA0586     | 1.49218     |
| AYPIP1       | 1.374888    | CD70      | 1.582662    | ELP4          | 0.675574    | KIAA1731     | 1.99825     |
| BCL3         | 2.171031    | CDC25A    | 1.370662    | ERF           | 1.343913    | KIF2C        | 1.469618    |
| BLOC1S2      | 1.611136    | CDCA2     | 1.548794    | ERRFI1        | 0.7342      | KIF4A        | 1.309953    |
| BRI3         | 1.340152    | CDCA3     | 1.610177    | FAM133B       | 1.34364     | KIFC1        | 1.366926    |
| BRI3P1       | 1.546793    | CDCA5     | 1.336007    | FAM158A       | 2.238459    | KRT222       | 0.613685    |
| BTN3A3       | 1.95368     | CENPBD1   | 0.681338    | FAM3A         | 1.361278    | LACTB2       | 0.621562    |
| BUB1         | 1.29454     | CENPE     | 1.215363    | FAM46C        | 1.520561    | LAGE3        | 1.336476    |
| BUB1B        | 1.777002    | CENPN     | 1.286913    | FAM98A        | 1.868986    | LENG1        | 1.663116    |
| C10ORF137    | 1.4131      | CENPQ     | 2.055474    | FAU           | 1.301277    | LGALS1       | 1.543264    |
| C10ORF41     | 0.502603    | CHD1      | 1.374563    | FDPS          | 1.374176    | LINS1        | 1.514225    |
| C11ORF70     | 0.547787    | CHERP     | 1.374179    | FDX1L         | 1.457109    | LOC100128731 | 1.353418    |
| C12ORF26     | 0.646565    | CHMP1A    | 1.367303    | FHOD1         | 1.335856    | LOC100128936 | 1.474862    |
| C12ORF45     | 1.331408    | CHP2      | 0.449325    | FLJ22795      | 1.649252    | LOC100129028 | 2.428756    |
| C14ORF156    | 1.429685    | CIR1      | 1.65824     | FLJ43681      | 1.830567    | LOC100129297 | 1.656124    |
| C14ORF93     | 0.71006     | CKS2      | 1.647693    | FRG1          | 1.610092    | LOC100129379 | 1.752259    |
| C15ORF38     | 0.64098     | CMC1      | 1.331083    | GADD45A       | 1.396641    | LOC100129650 | 1.441238    |
| C15ORF42     | 1.547957    | CORO7     | 1.358894    | GMFR          | 0.660258    | LOC100130003 | 1.454882    |
| C16ORF52     | 0.618152    | COX6B1    | 1.378484    | GNG4          | 1.45125     | LOC100130070 | 1.724371    |
| C19ORF22     | 1.377093    | COX7B     | 1.717472    | GNGT1         | 1.858629    | LOC100130154 | 2.226066    |
| C19ORF44     | 0.648019    | CPOX      | 1.692286    | GPATCH3       | 1.620661    | LOC100130886 | 0.69605     |
| C1ORF35      | 1.33793     | CXCR7     | 0.5446      | GPR172A       | 1.348516    | LOC100131785 | 1.335019    |
| LOC100131801 | 1.3194      | LOC645726 | 1.919625    | MGC71993      | 1.281378    | ODF2         | 1.276451    |
| LOC100132037 | 1.442311    | LOC645937 | 1.411599    | MGC87895      | 1.509317    | ORC1L        | 1.518546    |
| LOC100132418 | 1.42454     | LOC646197 | 1.617086    | MICB          | 1.371286    | OSAP         | 0.661231    |
| LOC100132457 | 1.89355     | LOC646576 | 0.500334    | MIR221        | 1.357492    | PATL1        | 1.38577     |
| LOC100132499 | 1.60235     | LOC646753 | 1.46071     | MIR886        | 2.361266    | PELP1        | 1.61311     |
| LOC100132948 | 1.68382     | LOC646819 | 1.500187    | MKL2          | 2.551981    | PFAS         | 1.380042    |
| LOC100133390 | 1.500664    | LOC647037 | 1.811877    | MKX           | 0.712526    | PHF21B       | 1.718663    |
| LOC100133812 | 1.365288    | LOC648622 | 1.633054    | MPHOSPH6      | 1.609677    | PHLDA3       | 1.983609    |
| LOC100133887 | 0.362622    | LOC648638 | 1.900106    | MRPL10        | 1.631106    | PHPT1        | 1.43751     |
| LOC100134537 | 1.659417    | LOC649548 | 1.401815    | MRPL15        | 1.430061    | PIBF1        | 1.525063    |
| LOC144438    | 1.559465    | LOC649839 | 2.078199    | MRPL19        | 1.346894    | PISD         | 1.432158    |
| LOC151579    | 1.396555    | LOC650298 | 1.567115    | MRPL41        | 1.371887    | PLA2G4C      | 2.367569    |
| LOC284988    | 1.883653    | LOC652545 | 1.540334    | MRPS17        | 1.418166    | PMS2L3       | 1.478905    |
| LOC338870    | 1.835081    | LOC652672 | 1.33077     | MT1A          | 2.523131    | PNMA2        | 0.693021    |
| LOC347292    | 1.603262    | LOC653874 | 1.714328    | MT1F          | 1.485696    | POMT2        | 0.687886    |
| LOC347376    | 3.224295    | LOC654121 | 1.431988    | MT1X          | 2.533954    | PPP1R12C     | 1.903344    |
| LOC387791    | 1.471175    | LOC727758 | 0.614924    | MT2A          | 2.779558    | PRMT10       | 1.386457    |
| LOC388339    | 1.547226    | LOC727865 | 1.251827    | MTE           | 3.159964    | PTTG3P       | 1.49936     |



| GENE      | FOLD CHANGE | GENE      | FOLD CHANGE | GENE    | FOLD CHANGE | GENE     | FOLD CHANGE |
|-----------|-------------|-----------|-------------|---------|-------------|----------|-------------|
| LOC391019 | 1.571402    | LOC728006 | 0.681138    | MTIF3   | 0.707748    | RALGAPB  | 1.417705    |
| LOC391126 | 1.504997    | LOC728244 | 1.940155    | MTMR6   | 1.607461    | RASSF1   | 2.065798    |
| LOC391370 | 1.874656    | LOC728590 | 1.891131    | MVD     | 1.423771    | RBM17    | 0.646229    |
| LOC391656 | 1.592894    | LOC728823 | 2.01042     | MYBBP1A | 1.504475    | RBM26    | 1.553303    |
| LOC392437 | 1.367284    | LOC729362 | 1.339078    | MYBL2   | 1.727078    | RDH13    | 1.422977    |
| LOC399491 | 1.524466    | LOC729421 | 0.544916    | NADSYN1 | 1.345947    | RECQL4   | 1.397307    |
| LOC400948 | 1.391886    | LOC729608 | 1.303723    | NCAPD2  | 1.456334    | RFWD3    | 1.414772    |
| LOC440145 | 1.927142    | LOC729646 | 1.903514    | NCAPD3  | 1.325066    | RHOT2    | 1.532961    |
| LOC440354 | 1.970208    | LOC729769 | 1.574934    | NCAPG   | 1.33953     | RIOK3    | 1.546605    |
| LOC440957 | 1.519554    | LOC729816 | 1.327598    | NDC80   | 2.020453    | RN5S9    | 1.417495    |
| LOC440991 | 2.059077    | LOC730183 | 0.64682     | NDUFA3  | 1.366374    | RNF181   | 1.291151    |
| LOC441377 | 1.850447    | LOC731640 | 2.144683    | NDUFB10 | 1.349643    | RNU1-3   | 2.464397    |
| LOC442454 | 1.761064    | LOC731985 | 1.46807     | NDUFB9  | 1.689956    | RNU1-5   | 1.759004    |
| LOC641768 | 2.267177    | LOC92755  | 1.254673    | NEIL2   | 2.501403    | RNU1A3   | 1.804236    |
| LOC642033 | 1.604119    | LSMD1     | 1.377138    | NEK2    | 1.594701    | RNU1F1   | 2.45227     |
| LOC643358 | 1.478226    | LTBP2     | 0.379304    | NEU1    | 1.547135    | RNU1G2   | 2.201603    |
| LOC643949 | 1.572175    | MAP2K2    | 1.391497    | NFKB1   | 1.415937    | RNU4ATAC | 2.002771    |
| LOC644033 | 1.338065    | MAP3K8    | 2.078596    | NFKBIA  | 1.396611    | RNU6-1   | 1.600701    |
| LOC644928 | 1.443024    | MAP7D2    | 0.723802    | NFKBIB  | 1.926538    | RNU6-15  | 1.606429    |
| LOC645233 | 2.069008    | MCM5      | 1.571462    | NIF3L1  | 0.717231    | RNU86    | 3.12876     |
| LOC645387 | 1.2515      | METRN     | 1.710783    | NPM3    | 1.349797    | RNY4     | 4.165886    |
| LOC645586 | 1.798766    | METTL11A  | 1.665658    | NRAS    | 1.462199    | ROMO1    | 1.532933    |
| RP9P      | 1.564468    | SHROOM3   | 1.459797    | STX8    | 1.294574    | TLL7     | 1.93222     |
| RPL12P6   | 1.725901    | SKIV2L    | 1.429712    | SUGT1   | 0.680271    | TUBD1    | 1.759565    |
| RPL23AP7  | 1.348205    | SLC2A3    | 1.277281    | SYT11   | 0.716484    | TUT1     | 1.605766    |
| RPN2      | 1.891316    | SLC35A5   | 0.645529    | TACC3   | 1.451563    | TXNDC17  | 1.437818    |
| RPRML     | 0.689465    | SLC35B3   | 0.675568    | TAF10   | 1.46912     | UBA6     | 1.708582    |
| RPS15     | 1.272556    | SLC36A4   | 1.586172    | TAP1    | 1.293056    | UBAP2    | 1.671385    |
| RPS21     | 1.392038    | SLC5A6    | 1.321955    | TBL3    | 1.638652    | UBL5     | 1.395871    |
| RPS23     | 0.734562    | SLU7      | 1.321717    | THAP10  | 0.612749    | UBLCP1   | 1.426508    |
| RPS26L    | 1.422297    | SMNDC1    | 1.424433    | THOP1   | 1.349524    | UHRF2    | 1.450225    |
| RPS28     | 2.480285    | SNAP29    | 0.703016    | TIMM8A  | 1.576699    | USP30    | 1.416457    |
| RRP1      | 2.029517    | SNHG12    | 2.740855    | TMEM166 | 0.659475    | UST      | 0.717473    |
| RRP12     | 1.827857    | SNHG6     | 1.442716    | TNFAIP3 | 10.11115    | UTP14A   | 1.472158    |
| RRP7A     | 1.330567    | SNORA10   | 1.362984    | TNFRSF9 | 5.854754    | VEGFA    | 1.699903    |
| RSRC2     | 1.36793     | SNORA59B  | 1.902207    | TNIP1   | 1.35603     | VPS33B   | 1.324278    |
| SAP18     | 0.468024    | SNORD3A   | 1.510705    | TOMM20L | 0.365857    | VPS4A    | 1.411978    |
| SBDS      | 2.143475    | SNORD3D   | 1.8649      | TOMM5   | 1.438556    | VTG1B    | 1.459415    |
| SCNM1     | 1.369459    | SNORD55   | 1.879463    | TPX2    | 1.345564    | WDR34    | 1.298855    |
| SDC4      | 1.478484    | SNORD56   | 1.461978    | TRAF2   | 1.530028    | YES1     | 1.338852    |
| SDHD      | 1.344804    | SNRPF     | 1.328464    | TRIM26  | 1.32933     | ZADH2    | 0.634956    |
| SEC61B    | 1.370921    | SNRPG     | 1.357171    | TRIP12  | 1.777271    | ZNF252   | 0.716161    |
| SELM      | 1.403241    | SPATA5L1  | 1.649718    | TRIT1   | 1.660886    | ZNF304   | 1.697754    |
| SEPW1     | 1.501067    | SPG3A     | 1.463355    | TRMT61A | 1.731303    | ZNF341   | 2.266905    |
| SERTAD1   | 1.612934    | SQSTM1    | 1.446502    | TSHZ1   | 0.622391    | ZNF431   | 1.926174    |
| SH3BP1    | 1.666441    | SRM       | 1.31773     | TSHZ3   | 0.62652     | ZNF467   | 0.668831    |
| SHFM1     | 1.365765    | STIL      | 1.537199    | TTK     | 1.355852    | ZNF583   | 1.326019    |
| ZNF764    | 1.761085    | ZNF787    | 1.341326    | ZNF845  | 1.506964    |          |             |

**Supplementary Table S4:** List of differentially expressed genes showing significant fold difference of expression levels in case of hsa-miR-195 overexpression and inhibition in MCF7 cells

| Gene name    | Fold change after miR-195 overexpression | Fold change after miR-195 inhibition | Difference in Fold change |
|--------------|------------------------------------------|--------------------------------------|---------------------------|
| PLA2G4C      | 9.91                                     | 2.368                                | 4.186                     |
| PHF21B       | 4.535                                    | 1.719                                | 2.639                     |
| RNY4         | 9.847                                    | 4.166                                | 2.364                     |
| RNU1-5       | 3.91                                     | 1.759                                | 2.223                     |
| SNHG12       | 5.903                                    | 2.741                                | 2.154                     |
| RNU1G2       | 4.705                                    | 2.202                                | 2.137                     |
| SNORD3D      | 3.701                                    | 1.865                                | 1.985                     |
| GNGT1        | 3.632                                    | 1.859                                | 1.954                     |
| TRMT61A      | 3.367                                    | 1.731                                | 1.945                     |
| RNU1-3       | 4.704                                    | 2.464                                | 1.909                     |
| LOC440354    | 3.742                                    | 1.97                                 | 1.899                     |
| ARC          | 3.396                                    | 1.816                                | 1.87                      |
| ANKRD54      | 2.725                                    | 1.487                                | 1.832                     |
| RNU86        | 5.523                                    | 3.129                                | 1.765                     |
| AEN          | 2.927                                    | 1.678                                | 1.744                     |
| RNU1A3       | 3.144                                    | 1.804                                | 1.743                     |
| TRIT1        | 2.861                                    | 1.661                                | 1.723                     |
| HIST1H4K     | 3.566                                    | 2.091                                | 1.705                     |
| CCDC86       | 2.442                                    | 1.434                                | 1.703                     |
| VGF          | 2.887                                    | 1.7                                  | 1.699                     |
| RN5S9        | 2.382                                    | 1.417                                | 1.68                      |
| RASSF1       | 3.431                                    | 2.066                                | 1.661                     |
| SERTAD1      | 2.666                                    | 1.613                                | 1.653                     |
| PMS2L3       | 2.409                                    | 1.479                                | 1.629                     |
| DAPK3        | 3.233                                    | 2.019                                | 1.601                     |
| RRP12        | 2.913                                    | 1.828                                | 1.594                     |
| TTLL7        | 3.074                                    | 1.932                                | 1.591                     |
| DUSP5        | 2.287                                    | 1.45                                 | 1.578                     |
| KIAA1731     | 3.079                                    | 1.998                                | 1.541                     |
| SBDS         | 3.282                                    | 2.143                                | 1.531                     |
| DUS3L        | 2.215                                    | 1.463                                | 1.513                     |
| SNORD3A      | 2.284                                    | 1.511                                | 1.512                     |
| THOP1        | 2.028                                    | 1.35                                 | 1.503                     |
| C10ORF41     | 0.318                                    | 0.503                                | -1.58                     |
| LOC100129028 | 1.484                                    | 2.429                                | -1.64                     |
| HSD17B6      | 0.365                                    | 0.615                                | -1.68                     |
| SDHD         | 0.698                                    | 1.345                                | -1.93                     |

**Supplementary Table S5:** The list of networks generated during Ingenuity pathway analysis using the differentially expressed genes obtained after hsa-miR-195 over-expression in MCF7 cells

| Molecules in Network                                                                                                                                                                                                                                                                                                                                                                            | Score | Focus molecules | Top functions                                                                                                     |
|-------------------------------------------------------------------------------------------------------------------------------------------------------------------------------------------------------------------------------------------------------------------------------------------------------------------------------------------------------------------------------------------------|-------|-----------------|-------------------------------------------------------------------------------------------------------------------|
| ACIN1, AKR1C3, Akt, AKT1S1, ANGEL1, ARL1, ARMC6, ATP5L, CADM1, CHFR, CREG1, DNA-directed RNA polymerase, EFTUD2, FOXC1, INPP5E, MIRLET7D (includes EG:406886), MPP3, NEXN, NOC2L, PDXDC1, PHLDA3, POLR3A, POLR3D, PROS1, QARS, RNF115, RPAP1, RPN2, SAP18, SFXN1, SLC3A2, STK36, TGFB3, ZC3H18, ZZZ3                                                                                            | 46    | 33              | Cellular Movement, Reproductive System Development and Function, Cardiovascular Disease                           |
| BTF3L4, CTDP1, DDX56, DRAP1, ERF, FANCI, GAS1, GNL2, GTF2F1, HELZ, HLA-DR, HLA-DRA, HLA-DRB1, Holo RNA polymerase II, MRPS5, MYBBP1A, MYC, MYCBP2, NELF, PAF1, POLR2A, RAGE, RNA polymerase II, RPL15, RRP12, SAFB, SETD2, SLC27A2, SPAG7, SSBP2, SUPT5H, SUPT6H, TAF10, TAF9B, UST                                                                                                             | 44    | 32              | Gene Expression, RNA Post-Transcriptional Modification, Antigen Presentation                                      |
| ATL2, AUH, AUTS2 (includes EG:26053), C12ORF44, CCND2, COPA, CTSC, DKK3, ECH1, enoyl-CoA hydratase, ERP29, EWSR1, FGFBP1, GBP2, HADHA, HADHB, IgG, Immunoglobulin, Interferon alpha, MED4, MED14, Mediator, NKTR, NLE1, PAFAH1B3, PATL1, PDIA6, PRKAB1, RSRC2, SERTAD1, TRIM28, UBQLN4, WBSR22, ZNF205, ZNRF3                                                                                   | 39    | 30              | Genetic Disorder, Metabolic Disease, Lipid Metabolism                                                             |
| AATF, BBS2, C15ORF23, C5ORF13, COMMD1 (includes EG:150684), CORO1A, DCP2, DCP1A, E2F7, EDC3, GNGT1, GPC4, IRAK2, LITAF, MHC CLASS I (family), MPP6, MRPL38, NFKB1, NFKB (complex), NFkB (family), NFKBIB, NOP14, Pro-inflammatory Cytokine, Serine Protease, SIAH2, SQSTM1, SUMO3, THOP1, TNFRSF12A, TNIP1, TRAFD1, TUBB2B, Ubiquitin, ZFP36, ZNF202                                            | 36    | 29              | Hematological Disease, Organismal Injury and Abnormalities, Gene Expression                                       |
| ACTA1, Alp, ALPL, APBA3, APP, ARL6IP5, BCKDK, BIRC6, C14ORF147, Caspase, CBR4, DNAH1, DUSP14, FSH, GCA, GPS2, HSD17B8, IARS2, IGFBP5, JUNB, KDM5B, Lh, LTBP2, PBK, PPAP2A, PPP2R5B, PSEN2, PSMD3, SMPD2, SPON1, SRI, SUCLA2, Tgf beta, VGF, ZNF773                                                                                                                                              | 35    | 30              | Lipid Metabolism, Molecular Transport, Small Molecule Biochemistry                                                |
| AP1S2, Ap2 alpha, ATPase, C3ORF1, CBL, CDK20, DLX1, DUSP5, EPHA4, GHR, GPC3, growth factor receptor, HGS, IER5L, ILKAP, INO80, INO80D, IPO13, NAPB, p85 (pik3r), PAX6, Pdgf, PDGF BB, PDGFD, PDX1 (includes EG:3651), PELP1, PICK1, Pkc(s), PLC gamma, PPP1R15A, SOX2, TIMP3, TRIM11, VPS37B, WNT5A                                                                                             | 33    | 27              | Cellular Development, Cellular Growth and Proliferation, Cell Morphology                                          |
| ADAP2, ANKRD1, CHD8, ENaC, ERK1/2, FKBP11, GRN, HERP, HEY1, HEY2, HIST1H1C, KLF13, METAP2, Notch, P-TEFb, peptidase, peptidylprolyl isomerase, PPI, PPIA (includes EG:5478), PPIC, PRDX6, PRSS8, RNF10, RNU1-4, S100A4, Secretase gamma, SEMA3A, SERPINE2, SH2B3, SLC12A4, SNAPC4, SNCA, TOP3B, VASN, ZFPM1 (includes EG:161882)                                                                | 31    | 26              | Cellular Growth and Proliferation, Nervous System Development and Function, Tissue Development                    |
| APC, CCDC76, CCNB1, CDC5L, Cyclin A, Cyclin B, Cyclin E, DAPK3, DAXX, E2f, E2F5, E4F1, Hdac, ID2, KIAA0240, LIN37, MAP1S, MCM2, MCM5, MDM4, NOP2, PCSK7, PCSK1N, PEA15, PRPF19, Ras, RASSF1, Rb, RBBP9, RBL2, RBMX, TSHZ3, Xrec, XRCC1, XRCC3 (includes EG:7517)                                                                                                                                | 30    | 26              | Cell Cycle, DNA Replication, Recombination, and Repair, Connective Tissue Development and Function                |
| ACTR6, ADH5 (includes EG:128), Ahr-aryl hydrocarbon-Arnt, alcohol dehydrogenase, BCL3, BCL11A, COL13A1, Ctpb, CYP1B1, CYP27B1, CYP3A5, DHRS2 (includes EG:10202), DUSP8, EDA2R, EPC1, ERRF1, glutathione transferase, GST, GSTA1, GSTA4, GSTM2, ISL1, Jnk, NR1H3, NR2F1, PECR, PIR, PXR ligand-PXR-Retinoic acid-RXR $\alpha$ , RAB7L1, Rxr, SERPINB1, TIP60, TRIP11, VitaminD3-VDR-RXR, YEATS4 | 28    | 25              | Drug Metabolism, Glutathione Depletion In Liver, Lipid Metabolism                                                 |
| ADAMTS1, ASB9, BNIP3L, C1ORF182, CCT4, COL5A1, collagen, Collagen(s), Cpla2, CTSL1, EXOC3, F12, FAM40A, FTH1, GADD45B, GADD45G, Hsp27, Hsp70, HSPB8, IL1, IL32, KLF9, NCOA5, P38 MAPK, PLA2, PLA2G7, PLA2G4C, Pld, PLSCR3, RALA, RAP2A, RAPGEF6, RPS6KA4, Sapk, STRN3                                                                                                                           | 27    | 25              | Cell Signaling, Carbohydrate Metabolism, Lipid Metabolism                                                         |
| ASCC2, CD19, EEA1, ELAC2, Gamma tubulin, HMOX1, IFIT2, IFN Beta, IL12 (complex), IL28RA, IRG, ISG15, JAK, KDM3A, KDM5A, KIT, LDL, LIPA, LT, LTA, LTBR, MKI67, NAPG, PI3K (complex), PIK3R4, PON2, Rab5, RUFY1, SLIT2, STAT5a/b, TNFAIP3, TRAF, UVRAG, VAV, VPS18                                                                                                                                | 25    | 23              | Cardiovascular System Development and Function, Lymphoid Tissue Structure and Development, Organismal Development |
| ATRIIP, Cbp/p300, Cofilin, DDB2, DPYSL2, ERCC2, ERCC3, ERK, GRWD1, Importin beta, IPO8, KPNA1, KPNA4, POLE, RAD23B, RAD9A, RNA polymerase I, Rock, RPA, RPA4, RRN3, SAA, Smad2/3-Smad4, SNUPN, SOX9, TDG, TFIIA, TFIIF,                                                                                                                                                                         | 25    | 23              | DNA Replication, Recombination, and Repair, Nucleic Acid Metabolism, Small Molecule Biochemistry                  |

| Molecules in Network                                                                                                                                                                                                                                                                                                                         | Score | Focus molecules | Top functions                                                                                         |
|----------------------------------------------------------------------------------------------------------------------------------------------------------------------------------------------------------------------------------------------------------------------------------------------------------------------------------------------|-------|-----------------|-------------------------------------------------------------------------------------------------------|
| TFIIH, TOPBP1, TP53BP1, UBR2, UBR5, XPC, ZBTB17                                                                                                                                                                                                                                                                                              |       |                 |                                                                                                       |
| ARPC1B, ATL3, C11ORF75, C16ORF48, C6ORF72, DHX8, DMWD, DPPA2, DVL3, DVL2 (includes EG:1856), ENDOD1, FXR2, MAPK1IP1L, MIR124, MOBKL2B, NOC3L, NT5C2, PLOD3, PRPF3, RAD51AP1, SDF4, SLC30A7, SRM, SUCLG2, TCEB3B, THAP1, TRIM29, TSR2, USP5, USP39, ZBTB8A, ZNF165, ZNF250, ZNF263, ZNF446                                                    | 25    | 23              | RNA Post-Transcriptional Modification, DNA Replication, Recombination, and Repair, Metabolic Disease  |
| Ap1, ARL2, Arp2/3, ASGR1, Calmodulin, CaMKII, CEP250, Ck2, Creb, CSPG5, EIF3, EIF2A, EIF3B, EIF3D, EIF3J, EIF4G3, F Actin, GAD1, GGMT, MICALL1, MYH3, MYL5, Myosin, PACSIN1, PIP4K2A, PLS1, POLM, PP1 protein complex group, PP1-C, PPP1CB, PPP1R14C, SIX1, SSR1, Tubulin, XRCC5                                                             | 24    | 23              | Protein Synthesis, DNA Replication, Recombination, and Repair, Connective Tissue Disorders            |
| ACVRL1, ADAMI2, AP3S1, BUD31 (includes EG:8896), C6ORF130, CNTNAP2, CTR9, DFNA5, E2F5, EEA1, EGLN1, ENO1, G3BP1, HSD17B6, KDM6B, KRII, LDB1, NKX3-2, NOL6, NUP214, PAPPA, PDLIM5, PIAS3, PIGF, RUNX3, SMAD2, SNIP1, SSBP4, SURF6, TGFB1, TGFB3, TLE4, TPM3, VASN, ZMIZ1                                                                      | 22    | 21              | Gene Expression, Cellular Development, Cellular Growth and Proliferation                              |
| ADCY, ADORA2B, CELSR3, CXCR7, DOCK2, Focal adhesion kinase, FZD4, G protein, GABBR2, GALR2, Gpcr, GPER, GPR37, GPR64, GPR160, GPR172A, Gs-coupled receptor, Gsk3, HBEGF, IL12 (family), LPAR3, LPXN, Mmp, NPY, Pias, PIAS3, Pka, PLC, PTGER1, PTGER2, Rac, SRC, STAT, ZNF426, ZP3                                                            | 22    | 21              | Cancer, Neurological Disease, Cardiovascular System Development and Function                          |
| ACBD6, C11ORF54, CCDC45, CHERP, GMDS, HNF1A, HNF4A, ISOC1, LSM3, MCCC1, RBKS, RSPH3, RTN4IP1, SFRS8, SMAD3, TTC25, TUFT1, TXNL4B, WARS2, WBP4, ZNF277                                                                                                                                                                                        | 19    | 16              | Gene Expression, Embryonic Development, Tissue Development                                            |
| ARRB1, ATAD3A, BAT1, BAT5, BCLAF1, BUD13, CCDC93, CCL14, CHCHD3, CHD1 (includes EG:1105), CWC22, DDX39, DHRS2 (includes EG:10202), DHX16, FRMD4A, GPKOW, GRK6, HNRNPA1, HNRNPA1L2, IGF2BP2, KIN, LARP7 (includes EG:51574), LMNB2, MRPS27, PIP, PPIA (includes EG:5478), PRSS23, RBMX2, RECQL4, SAFB, STOM, THOC4, TMEM222, TRAF3IP1, ZBTB43 | 19    | 19              | RNA Post-Transcriptional Modification, Molecular Transport, RNA Trafficking                           |
| AHSA2 (includes EG:130872), APPBP2, ARID3B, BCL3, BDP1, BNC2, BRF1, CMAS, CREG1, DNAH1, DNASE1, F2R, Gen51, HSP90AA1, IKZF1, IRF1, KDM5A, MDM4, MED4, NR3C1, PI4KAP2, RB1, RBMS2, RNASEN, SNAPC1, SNAPC3, SPTAN1, STRADB, TAF4B, TBL3, TBP, TNFAIP3, TRIM45, TSSC4, WDR62                                                                    | 18    | 19              | Gene Expression, Respiratory Disease, Digestive System Development and Function                       |
| C19ORF42, FAM158A, HIST1H4K (includes EG:8362), HMGN4 (includes EG:10473), HNF4A, KLHL28, LRIG2, NUDT11, ONECUT1, SDR39U1, SLC35A5, TMEM59 (includes EG:9528), TRAF6, TRMT6, TRMT61A, TTC35, TTC38, ZNF304, ZNF324, ZNF557                                                                                                                   | 18    | 15              | Digestive System Development and Function, Hepatic System Development and Function, Organ Development |
| AKAP1, C16ORF74, C5ORF41, CDKN1A, CIZ1, DAXX, DPF1, DPP3, FEN1, FGF13, GPS2, KBTBD8, LENG8, LGALS1, LIG1, MDM4, MIR106B (includes EG:406900), MIR17 (includes EG:406952), MIR196A2, MKX, NEUROG2, PARP2, PARP6, PLK2, PNPT1, PPP3CA, RB1CC1, RIMKLB, RNF121, SMOC2, SOX9, TP73, TTLL5, UBL3, XRCC1                                           | 17    | 18              | DNA Replication, Recombination, and Repair, Cell Cycle, Cellular Development                          |
| CALM2, CCDC66, CENPT, CFL1, CLCN6, CTU2, DDX6, DHX29, FBXO33, FKBP8, GLCE, GNG4, KIAA1683, LRRC59, LSM12, MIR205 (includes EG:406988), MIR24-1 (includes EG:407012), MIR31 (includes EG:407035), MTCH2, MXI1, OFD1, PDGFRA, PHF21A, PISD, PRRX2, RAB2A, RAB5C, RAB9B, RIC8B, RNF10, RPL22, SDCCAG8, Tropomyosin, VHL, WDR55                  | 17    | 18              | Tissue Morphology, Carbohydrate Metabolism, Drug Metabolism                                           |
| 14-3-3, alcohol group acceptor phosphotransferase, BRAF, CAMK2N1, ECSIT, ETV5, HRAS, IKK (complex), Ikk (family), LGALS1, MAP2K2, MAP2K1/2, MAP3K, MAP3K1, MAP3K9, MAP3K11, Mapk, MAPK13, Mek, MUC16, Nfat (family), OIP5, Pak, PPI/PP2A, PRKCH, Raf, Rap1, RC3H2, RFWD3, RPS23, Sos, TCR, TRIB1, UBA6, UBE2N                                | 16    | 20              | Developmental Disorder, Genetic Disorder, Cellular Movement                                           |
| CD79B, CDCA2, DAXX, DEXI, DUT (includes EG:1854), EDIL3, ELK3, ETS1, FAM3C, GOLM1, ING4, LMTK2, LTB, NEK2, NOC2L, P2RX4, PAFAH1B3, PPP1CA, PPP1CC, PPP1R2, PPP1R13B, PPP1R15A, PPP2R5C, RAD23B, REEP5, RPL13A, SCOC, SEC62, TAF1A, TMSB15A (includes EG:11013), TP53, ZAP70, ZMAT3, ZNF140, ZNF24 (includes EG:7572)                         | 16    | 18              | Cell-To-Cell Signaling and Interaction, Cellular Function and Maintenance, Cell Death                 |
| ADCK1, AIF1L, APIG1, AP3S2, AP4E1, AP4M1, Arf, ARF1, ARF5, ARF6, ARFGAP1, ARFIP2, CAV2, CEP350, CLCN7, COPG, GBF1, GOLGB1, GOSR2, HOXA9, HOXB8, IRX3, IRX6, MIR210 (includes EG:406992), oleic acid, OSBPL8, PACS1, PBX3, PBXIP1, PIK3IP1, PLEKHM2, QTRT1, RAB1A,                                                                            | 16    | 17              | Molecular Transport, Protein Trafficking, Cellular Assembly and Organization                          |

| Molecules in Network | Score | Focus molecules | Top functions |
|----------------------|-------|-----------------|---------------|
| TMEM35, USO1         |       |                 |               |

**Supplementary Table S6:** The list of networks generated during Ingenuity pathway analysis using the differentially expressed genes obtained after hsa-miR-195 deletion in MCF7 cells

| Molecules in Network                                                                                                                                                                                                                                                                                                    | Score | Focus molecules | Top functions                                                                                                   |
|-------------------------------------------------------------------------------------------------------------------------------------------------------------------------------------------------------------------------------------------------------------------------------------------------------------------------|-------|-----------------|-----------------------------------------------------------------------------------------------------------------|
| ACLY, BUB1, BUB1B, CENPE, CKS1B, CSE1L, DHCR7, DUSP5, EIF2S1, EIF3A, GADD45A, IFN Beta, IFN TYPE 1, IgG, IRF1, IRG, ISG15, KRT8, LDL, MAD1L1, Mapk, NDC80, NEK2, PP1 protein complex group, PP1-C, PP2A, PPP1R1A, PRKRA, RPL5, RPS23, SLC2A3, STIL, TAP1, Vegf, YES1                                                    | 38    | 25              | Cell Cycle, Cellular Assembly and Organization, DNA Replication, Recombination, and Repair                      |
| ALPL, Ap1, CD70, COX6B1, COX6C, COX7B, COX8A, Cytochrome c oxidase, DNNTIP1, ELP4, Estrogen Receptor, FSH, GLRX2, Histone h4, Ifn gamma, Jnk, KIFC1, LSM7, LTBP2, MEPCE, MT1F, MYB (includes EG:4602), Pdgf, PELP1, PHLDA3, Pias, RANGAP1, Rxr, SNRPF, SNRPG, Tgf beta, TRIM26, TRIP12, TUT1, VGF                       | 37    | 24              | Energy Production, Cell Cycle, Cell Morphology                                                                  |
| alcohol group acceptor phosphotransferase, Alpha tubulin, APC, AURKA, AURKAIP1, BIRC5, BTG2, CDC25A, CKS2, Cpla2, Cyclin A, Cyclin B, Cyclin E, CYP27B1, E2f, E2F5, ECT2, ERK1/2, Gamma tubulin, Hdac, IDE, KIF2C, MAP3K8, MAPKAPK5, MCM5, MT2A, MYBL2, ORC1L, PLA2G4C, RACGAP1, RASSF1, RPA3, TPX2, TSHZ3, TTK         | 36    | 24              | Cell Cycle, Cellular Assembly and Organization, DNA Replication, Recombination, and Repair                      |
| 26s Proteasome, Akt, ASGR1, BLOC1S2, Caspase, CCL2, CDCA3, ERRFI1, GNGT1, hCG, Hsp27, Hsp70, HSPA5, IFT57, Ikb, IL32, Importin beta, Nfkb1-RelA, NFKB1A, NFKB1B, NIF3L1, PTTG1, RIOK3, SAA, Sapk, SDHA, SRP19, SSR4, STIP1, TRAF2, TRIAP1, TXNDC17, Ube3, Ubiquitin, USP5                                               | 32    | 22              | Cancer, Hematological Disease, Organismal Injury and Abnormalities                                              |
| BCL3, CAMK2N1, CD3, FTL, Gm-csf, HLA-E, IER3, IKK (complex), Ikk (family), LGALS1, MAP2K2, MAP3K, Mek, MHC Class I (complex), MHC CLASS I (family), MPHOSPH6, NFKB1, NFKB (family), Nfkb-RelA, NRAS, PDGF BB, PEBP1, PI3K (complex), PIK3R4, Raf, RHOB, RPN2, SERTAD1, TCR, THOP1, TNFAIP3, TNFRSF9, TNIP1, TRAF, TYRO3 | 28    | 20              | Cell Cycle, Gene Expression, Cell Signaling                                                                     |
| ATAD3A, BTG2, CCDC92 (includes EG:80212), CDCA2, CDKN2AIP, CPOX, CTSK, EIF2S1, FGF2, HJURP, HNRNPA1L2, HTRA1, IFNB1, ISG15, MAD1L1, MKI67, MT1A, NEK2, NOC2L, PPP1CA, PPP1R10, PPP2R5C, PRKRA, RECQL4, RNU1-1, RPS28, S100A8, STOM, TACC3, TAP1, TERT, TOX4, TP53, TXNRD1, ZC3H4                                        | 27    | 20              | Cellular Development, Cellular Growth and Proliferation, Nervous System Development and Function                |
| ARF3, Calmodulin, CDCA5, CHMP1A, DCP2, EDC3, EDF1, ERK, F Actin, GDI1, GMPR, Histone h3, IL8, Immunoglobulin, KIAA0895, KIF23, MIR1, MSN, Nfat (family), NGF, P38 MAPK, PATL1, Pkc(s), Pld, PNMA2, Rac, RALA, Ras, Ras homolog, Rho gdi, RHOT2, SDC4, SH3BP1, SHROOM3, UST                                              | 24    | 20              | DNA Replication, Recombination, and Repair, Cellular Assembly and Organization, Post-Translational Modification |
| AKR1C3, ANGEL1, CCHCR1, DEFB4A, EBF3, FABP6, FRG1, IFNGR2, ME1, MIRLET7D (includes EG:406886), MRPL19, MRPL41, MVD, NCF1C, NEU1, NFKB1, NKRF, NR4A2, PMS2L3, PTEN, RETN, SMURF2, T3-TR-RXR, TAL1, TARBP2, TICAM1, TNFAIP1, TNFAIP3, TNFRSF9, TP53BP1, TRAF, TRAF4, UTP14A, VPS4A                                        | 22    | 17              | Immunological Disease, Gene Expression, Infectious Disease                                                      |
| CD3EAP, CKMT1A, GTF3C2, IKBKE, KIF11, LAGE3, METTL11A, MKX, MT-ND1, MT-ND4, NADH2 dehydrogenase, NADH2 dehydrogenase (ubiquinone), NDUFA1, NDUFA3, NDUFA6, NDUFA13, NDUFB7, NDUFB9, NDUFB10, NDUFS1, NDUFS8, NUTF2, PFAS, POLR3C, RNY4, SBDS, SDHA, SDHB, SDHD, SNORD3A, SSB, TBP, TNFAIP3, TROVE2, VEGFA               | 20    | 16              | Cancer, Neurological Disease, Genetic Disorder                                                                  |
| ANPEP, ARC, AUH, AZU1, BTN3A3, CD40LG, CSNK1D, DAPK3, DEFA1 (includes EG:1667), DYNLL2, EGF, Gelatinase, GNLY, HIST3H2A, IL15, IL32, IL1R2, Lh, MDM2, MICB, MIR152 (includes EG:406943), NFRKB, PAWR, POU2F1, RASAL2, RNF217, RNU6-1, RPS21, SLU7, THAP10, TNF, TNFRSF9, TNFSF9, TNIP1, VCL                             | 20    | 16              | Inflammatory Response, Drug Metabolism, Lipid Metabolism                                                        |
| ARL6, ASGR2, BAT3, C20ORF111, CDC45, CHERP, CIAO1, CIR1, COPB2, DPM1, GNL3, GTF3C5, HDAC8, HNF4A, LSMD1, MRPL15, MRPS15, MT1X, PHPT1, POLR1C, PSMB1, RPAP1, SEC61B, SFHM1,                                                                                                                                              | 19    | 15              | Carbohydrate Metabolism, Nucleic Acid Metabolism, Small                                                         |

| Molecules in Network                                                                                                                                                                                                                                                                                                                                                                 | Score | Focus molecules | Top functions                                                                                  |
|--------------------------------------------------------------------------------------------------------------------------------------------------------------------------------------------------------------------------------------------------------------------------------------------------------------------------------------------------------------------------------------|-------|-----------------|------------------------------------------------------------------------------------------------|
| SLFN11, SNW1, SRP54, SRSF2, TROVE2, VIPAR, VPS41, VPS33B, WBP4, WBSR22, ZNF764                                                                                                                                                                                                                                                                                                       |       |                 | Molecule Biochemistry                                                                          |
| ANKRD1, Ck2, DDB2, DNAJC7, DNAJC10, Fibrinogen, GTF3C5, HSP, Hsp90, HSPA14, HSPB6, HSPB7, HSPB8, Ifn, IL1, IL32, IL12 (complex), IL12 (family), IL18RAP, IL1F6, IL1F8, IL1F9, Interferon alpha, Mmp, NELF, NFkB (complex), NPM3, ODF1, PIBF1, RNA polymerase II, SQSTM1, SUGT1, TAF10, WDR34, XAB2                                                                                   | 17    | 14              | Dermatological Diseases and Conditions, Genetic Disorder, Connective Tissue Disorders          |
| Actin, ACTR8, ALDH9A1, APEX2, ARFIP1, ATL3, C12ORF45, CDC14B, CDCA7L, DCTD, DEPDC1, ELF4, KIAA1468, KIF4A, MIR124, MIR124-1 (includes EG:406907), MTMR6, NCAPD2, NCAPG (includes EG:64151), NCAPH, NECAP2, NEK6, OSBPL8, PFDN6, PTTG1P, RDH, RDH10, RDH11, RDH13, RUVBL2, S100A11, SECISBP2, SEPW1, SURF4, TMEM109                                                                   | 17    | 14              | DNA Replication, Recombination, and Repair, Cell Cycle, Cellular Assembly and Organization     |
| 12-hydroxyeicosatetraenoic acid, ADAM17, APBA3, C11ORF70, C4ORF49, CAMLG, CENPN, CNTF, EGFR, Egfr-ErbB2, FHOD1, G-protein beta, GRB2, IIR, IRS1, MAP2K5, MIR122 (includes EG:406906), MRPL36, MYCN, NDN, NUBP1, NUMBL, ONECUT1, P110, PPP1R12C, PTGER1, RIN2, RNF122, RPS5, RPS15, RRAS, TAOK3, TMEM55B, UBAP2, ZKSCAN3                                                              | 17    | 14              | Cell Cycle, Connective Tissue Development and Function, Cancer                                 |
| AIRE, ARMC1, BCORL1, DDX23, EFTUD2, FAM178B, GNL3, HIST1H2AC, KBTBD8, MIR138-1 (includes EG:406929), MIR138-2 (includes EG:406930), MIR183 (includes EG:406959), MIR221 (includes EG:407006), MYBBP1A, MYC, NCAPD3, NCAPG2, NEIL2, NFYB, NOP56, ODF2, PCNA, PNPT1, PRPF6, PRPF8, RNMTL1, SART1, SKIV2L, SMNDC1, SNRNP200, STX16, TSHZ1, TSR2, USP39, ZNF598                          | 17    | 14              | RNA Post-Transcriptional Modification, Cellular Development, Cellular Growth and Proliferation |
| ANXA1, C7ORF50, Ca2+, CALCA, CCDC86, DLST, EPO, FARSA, FAU, FOXP3, IL2, ITGA4, Laminin, METAP2, MRPS17, MTF2, PDCD2L, PINX1, POLR1A, POLR1B, POLR1C, POLR3K, PRNP, PTHLH, PTHR1, S100A11, SCNM1, sodium chloride, TBL3, TNFRSF11A, TNFSF9, TRPM4, USP11, USP25, WNT5A                                                                                                                | 17    | 14              | Carbohydrate Metabolism, Small Molecule Biochemistry, Cell Morphology                          |
| ACIN1, ALDOA, AP2B1, ARRB1, C1ORF35, CHD1 (includes EG:1105), CLPB, DDX39, DPP3, FAM46C (includes EG:54855), GBAS, MPND (includes EG:84954), NSF, OSBPL10, PCBP3, PGAM5, RBM17, RNPS1, SAP18, SF3A2, SF3B2, SNAP29, SNRNP70, SNRPC, SRRM2, SS18L1, STX7, STX8, TIMM8A, USP30, VAMP7, VTI1A, VTI1B, WRNIP1, ZC3H18                                                                    | 15    | 13              | RNA Post-Transcriptional Modification, Cellular Assembly and Organization, Cellular Compromise |
| AEN, C17ORF61, C8ORF30A, CDC34 (includes EG:997), CHFR, COX6C, DDX58, EXOSC9, FAM176A, FDPS, heparan sulfate, hydrogen peroxide, KIAA0776, MDM4, PSMD2, PTN, RFD3, RLIM, RNF11, RNF181, TRAF7, TRIM25, TRIM26, TRIM31, TRIT1, UBA6, UBE2D1, UBE2D2, UBE2D3 (includes EG:7323), UBE2N, UBE2V1, UBE2V2, UBE4A, UBLCP1, UHRF2                                                           | 15    | 13              | Post-Translational Modification, Protein Degradation, Protein Synthesis                        |
| ATAD2, BDKRB1, C14ORF156, C21ORF122, CNR2, CXCR7, CYSLTR2, ESR1, FOS, Gper, GPR50, GPR172A, HESX1, IL9, LPAR1, LPAR2, LPAR3, MIR214 (includes EG:406996), MKL1, MKL2, NADSYN1, NR2C2, NR2C2AP, P2RY1, P2RY6, P2RY11, PISD, PTGER1, PTGER4, RPRML, RRP12, SMARCA4, SRF, STAT3, ZNF467                                                                                                 | 15    | 13              | Tissue Morphology, Organismal Injury and Abnormalities, Gene Expression                        |
| ABCF3, ANGEL2, AP2A1, BARD1, C19ORF44, CP110, DNAJA2, FAM158A, GBF1, GPATCH3, HIST1H4K (includes EG:8362), HNF4A, KBTBD7, KIAA1967, LENG1, LLLGL1, MRPL49, PI4KB, PJA2, PNMA1, POLRMT, RAP2C, RBM26, SPATA5L1 (includes EG:79029), TOE1, TP53, TRMT6, TRMT61A, TTC35, ZNF304                                                                                                         | 14    | 12              | Infection Mechanism, Gene Expression, Cell Cycle                                               |
| ATL1, C6ORF130, CCT5, CLK2, G protein alpha, G-protein beta, G-protein gamma, GNG2, GNG3, GNG4, GNG10, GNG13, GSN, HAVCR2, ITK, LGALS9, MUC1, NCF2, P2RY2, PNO1, PPP4R1, PPP4R2, PTGER4, RALGAPB, RTN4, SLC35A5, SMEK1, SMEK2, SPRR2A, SRC, SRM, SRPX, TGFB1, TNFRSF11A, UBL5                                                                                                        | 14    | 12              | Inflammatory Response, Cellular Movement, Connective Tissue Development and Function           |
| 3-alpha,17-beta-androstenediol, 3-beta,17-beta-androstenediol, adenosine-tetraphosphatase, ATP5A1, ATP5B, ATP5C1, ATP5D, ATP5F1, ATP5G1, ATP5H (includes EG:10476), ATP5I, ATP5J, ATP5J2, ATP5L, ATP5S, ATP6V1H, beta-estradiol, CALCA, CGA, Creb, ERF, GTF2B, H+-transporting two-sector ATPase, Hat, HSD17B6, MAOA, MED21, MIR125B1, PARK2, PPP1R3F, PSENNEN, RNU1-4, SYT11, ZNF91 | 12    | 11              | Energy Production, Nucleic Acid Metabolism, Small Molecule Biochemistry                        |

| <b>Molecules in Network</b> | <b>Score</b> | <b>Focus molecules</b> | <b>Top functions</b>                                                                        |
|-----------------------------|--------------|------------------------|---------------------------------------------------------------------------------------------|
| MRPL10, USP22               | 2            | 1                      | Post-Translational Modification, Dermatological Diseases and Conditions, Infectious Disease |

**Supplementary Table S7:** The list of 300 differentially expressed genes after overexpression of hsa-miR-195 in MDA MB-231 cells

| GENE      | FOL D CHANGE | GENE      | FOL D CHANGE | GENE         | FOL D CHANGE | GENE         | FOL D CHANGE |
|-----------|--------------|-----------|--------------|--------------|--------------|--------------|--------------|
| OASL      | 17.06894     | SGMS2     | 3.700018     | PLEKHA4      | 2.439895     | SNHG1        | 1.936489     |
| HIST2H2BE | 16.47681     | NOV       | 3.640053     | ZNF433       | 2.439837     | ZNF614       | 1.913637     |
| IFIT2     | 15.15934     | KLF4      | 3.590595     | LOC728014    | 2.371492     | SNHG12       | 1.883175     |
| TNFAIP3   | 14.58476     | DDIT3     | 3.537082     | ZNF165       | 2.365814     | DCP1A        | 1.882825     |
| GKN2      | 13.09462     | PPP1R3C   | 3.497304     | SDF2L1       | 2.320492     | UTX          | 1.881167     |
| EPSTI1    | 10.86279     | HERC5     | 3.330319     | BAMBI        | 2.318819     | ZCCHC3       | 1.859662     |
| ZNF442    | 9.638604     | GADD45A   | 3.225136     | HOXD1        | 2.315685     | RP5-1022P6.2 | 1.85787      |
| IFIT3     | 9.007547     | LOC728473 | 3.189068     | NRAS         | 2.295343     | LOC644132    | 1.852055     |
| EGR2      | 7.842551     | TRAF1     | 3.132812     | CRELD2       | 2.292652     | FSTL3        | 1.844205     |
| IFIH1     | 7.586282     | SAMD9     | 3.104155     | ZNF20        | 2.285483     | ABTB2        | 1.835654     |
| ISG20     | 7.227149     | CPEB3     | 3.074315     | NFKB2        | 2.283129     | C2orf49      | 1.831587     |
| ZNF844    | 6.877119     | KIAA1199  | 3.050018     | TINAGL1      | 2.281333     | UFM1         | 1.831426     |
| EGR1      | 6.876925     | IGFBP6    | 3.020361     | MXD1         | 2.276155     | RNF103       | 1.830244     |
| TXNIP     | 6.464297     | RHEBL1    | 3.002876     | CITED2       | 2.275989     | C9orf6       | 1.823248     |
| C7orf53   | 6.33289      | TMEM49    | 2.99689      | ZFP82        | 2.26644      | IRF9         | 1.823126     |
| RARRES3   | 5.901725     | ARL5B     | 2.949305     | LOC100130557 | 2.245823     | UGCG         | 1.807145     |
| PLCG2     | 5.874659     | PPP1R15A  | 2.939112     | SELM         | 2.235516     | SPAG9        | 1.806158     |
| IFI44     | 5.74208      | HERPUD1   | 2.924858     | NFKBIE       | 2.221349     | MEIS3P1      | 1.80142      |
| ZC3HAV1   | 5.49471      | RELB      | 2.81942      | NFKBIA       | 2.199819     | ADAMTS1      | 1.799562     |
| GBP4      | 5.478608     | IFI6      | 2.817659     | ZNF211       | 2.192035     | ZNF317       | 1.79684      |
| AURKAPS1  | 5.457495     | CD55      | 2.792112     | TIPARP       | 2.172029     | CRISPLD2     | 1.794408     |
| FLJ22639  | 5.343414     | MAFF      | 2.789421     | CCNL1        | 2.155736     | TUBB2A       | 1.783384     |
| ID2       | 5.320987     | DNAJB9    | 2.780508     | EVI2B        | 2.13973      | SFRS17A      | 1.780933     |
| MT1F      | 5.313781     | OTUD1     | 2.751975     | ZNF35        | 2.128735     | ZBTB43       | 1.779689     |
| PTGS2     | 5.296492     | CEBPD     | 2.751596     | PLK2         | 2.121539     | TAF1D        | 1.77116      |
| ISG15     | 5.190974     | C5orf41   | 2.742389     | USPL1        | 2.076638     | LOC653506    | 1.770054     |
| FAM46A    | 5.00128      | CCL5      | 2.698931     | SQSTM1       | 2.058003     | NCOA7        | 1.769459     |
| PMAIP1    | 4.995643     | SIPA1L2   | 2.680575     | MYLIP        | 2.052192     | SPANXB2      | 1.768877     |
| DNAJC27   | 4.929485     | CCRN4L    | 2.670748     | CBLB         | 2.037692     | ZNF296       | 1.765277     |
| MAL2      | 4.63144      | LOXL4     | 2.622707     | RAB30        | 2.036317     | ARID5B       | 1.761003     |
| CLIC3     | 4.620813     | SDC4      | 2.607125     | BIRC3        | 2.026914     | FLJ38717     | 1.755854     |
| HIST1H2BE | 4.261324     | DUSP10    | 2.571684     | SLC30A1      | 2.025615     | TSC22D1      | 1.754877     |
| IL8       | 4.167474     | CENTA1    | 2.567407     | FZD4         | 2.007027     | VEGFC        | 1.754647     |
| LOC400750 | 3.982144     | PTGER4    | 2.554784     | KIAA1370     | 1.985903     | ZNFX1        | 1.733294     |
| HERC6     | 3.971393     | ZNF26     | 2.492114     | JUN          | 1.978861     |              | 1.729764     |
| JUNB      | 3.938018     | ZNF34     | 2.457071     | NFIL3        | 1.959953     | IER2         | 1.729639     |
| SLC25A24  | 3.870423     | LOC730020 | 2.453708     | GADD45B      | 1.948742     | LOC400027    | 1.725512     |
| CYP1B1    | 3.836099     | ZNF140    | 2.449402     | TARDBP       | 1.94607      | FAM179B      | 1.724479     |



| GENE      | FOL D CHANGE | GENE             | FOL D CHANGE | GENE             | FOL D CHANGE | GENE     | FOL D CHANGE |
|-----------|--------------|------------------|--------------|------------------|--------------|----------|--------------|
| ZFAND2A   | 1.717806     | ADM              | 1.672243     | U2AF1L2          | 1.646148     | ATF4     | 1.502976     |
| SCYL2     | 1.713385     | USP36            | 1.671429     | RSRC2            | 1.640113     | POFUT2   | 1.497713     |
| RABGGTB   | 1.710804     | TBCC             | 1.655036     | CCDC49           | 1.637061     | STK19    | 1.497579     |
| ZNF17     | 1.709293     | MOAP1            | 1.647446     | TSPAN8           | 1.634878     | WBP4     | 1.496859     |
| PDRG1     | 1.704679     | U2AF1L2          | 1.646148     | MYC              | 1.633516     | CIR1     | 1.484091     |
| C1orf52   | 1.704209     | RSRC2            | 1.640113     | RFX1             | 1.626561     | ARMET    | 1.483472     |
| C20orf111 | 1.697283     | CCDC49           | 1.637061     | C10orf137        | 1.624372     | BRD2     | 1.476724     |
| LOC388796 | 1.69455      | TSPAN8           | 1.634878     | PTBP2            | 1.622112     | DNAJB11  | 1.469135     |
| TDRD7     | 1.693787     | MYC              | 1.633516     | CHMP1B           | 1.620053     | NFE2L2   | 1.467157     |
| FGFR1OP2  | 1.693712     | RFX1             | 1.626561     | RND3             | 1.611452     | CALR     | 1.465663     |
| HYOU1     | 1.687914     | C10orf137        | 1.624372     | RNF44            | 1.607222     | COQ10B   | 1.455646     |
| EAF1      | 1.686408     | PTBP2            | 1.622112     | CLK1             | 1.597759     | RYBP     | 1.450223     |
| TNIP1     | 1.682705     | CHMP1B           | 1.620053     | TMEM170<br>A     | 1.593665     | UBAP1    | 1.449914     |
| C6orf111  | 1.678955     | RND3             | 1.611452     | ZNF721           | 1.592432     | MAT2A    | 1.446107     |
| ADNP2     | 1.674116     | RNF44            | 1.607222     | SFRS18           | 1.588286     | NXF1     | 1.444505     |
| ADM       | 1.672243     | CLK1             | 1.597759     | FAM53C           | 1.58568      | ATP6V0A1 | 1.444491     |
| USP36     | 1.671429     | TMEM170<br>A     | 1.593665     | TIGA1            | 1.574824     | SERTAD1  | 1.441112     |
| TBCC      | 1.655036     | ZNF721           | 1.592432     | IFITM3           | 1.57379      | BTG1     | 1.441075     |
| MOAP1     | 1.647446     | SFRS18           | 1.588286     | MTF1             | 1.573158     | IER5     | 1.440759     |
| U2AF1L2   | 1.646148     | FAM53C           | 1.58568      | TUFT1            | 1.571844     | C19orf10 | 1.425351     |
| RSRC2     | 1.640113     | TIGA1            | 1.574824     | C3orf19          | 1.566994     | BCL2L2   | 1.423364     |
| CCDC49    | 1.637061     | IFITM3           | 1.57379      | SNIP1            | 1.566522     | SPRY2    | 1.414353     |
| TSPAN8    | 1.634878     | MTF1             | 1.573158     | KLF5             | 1.563255     | PPTC7    | 1.412823     |
| MYC       | 1.633516     | TUFT1            | 1.571844     | TBC1D15          | 1.562179     | DERL2    | 1.405918     |
| RFX1      | 1.626561     | C3orf19          | 1.566994     | LOC143666        | 1.559991     | SEC11C   | 1.401056     |
| C10orf137 | 1.624372     | SNIP1            | 1.566522     | PNPLA2           | 1.553494     | NFKB1    | 1.399158     |
| PTBP2     | 1.622112     | KLF5             | 1.563255     | MBIP             | 1.553335     | BCL2L13  | 1.395131     |
| CHMP1B    | 1.620053     | TBC1D15          | 1.562179     | MAP1LC3B         | 1.552862     | SAT2     | 1.387294     |
| ZFAND2A   | 1.717806     | LOC14366<br>6    | 1.559991     | PCGF1            | 1.549372     | CHMP1A   | 1.379048     |
| SCYL2     | 1.713385     | PNPLA2           | 1.553494     | LOC100132<br>715 | 1.546334     | CCND3    | 1.367315     |
| RABGGTB   | 1.710804     | MBIP             | 1.553335     | ZNF207           | 1.543732     | KPNA4    | 1.364454     |
| ZNF17     | 1.709293     | MAP1LC3B         | 1.552862     | MIDN             | 1.538633     | C12orf47 | 1.364026     |
| PDRG1     | 1.704679     | PCGF1            | 1.549372     | ATG12            | 1.537057     | EIF1     | 1.348476     |
| C1orf52   | 1.704209     | LOC10013<br>2715 | 1.546334     | ELF1             | 1.530592     | AHR      | 1.027235     |
| C20orf111 | 1.697283     | ZNF207           | 1.543732     | CABLES1          | 1.526789     | TUBA1A   | 0.878808     |
| LOC388796 | 1.69455      | MIDN             | 1.538633     | KIF5B            | 1.525714     | CMTM7    | 0.74677      |
| GENE      | FOL D CHANGE | GENE             | FOL D CHANGE | GENE             | FOL D CHANGE | GENE     | FOL D CHANGE |

|                      |          |                  |          |               |          |           |          |
|----------------------|----------|------------------|----------|---------------|----------|-----------|----------|
| TDRD7                | 1.693787 | ATG12            | 1.537057 | MAP2K1IP<br>1 | 1.525342 | LOC730744 | 0.738232 |
| FGFR1OP2             | 1.693712 | ELF1             | 1.530592 | SLU7          | 1.523212 | LOC402175 | 0.735079 |
| HYOU1                | 1.687914 | CABLES1          | 1.526789 | KRT8          | 1.51789  | HNRPUL1   | 0.726829 |
| EAF1                 | 1.686408 | ADM              | 1.672243 | RRAGC         | 1.512836 | UBE4B     | 0.725045 |
| TNIP1                | 1.682705 | USP36            | 1.671429 | HNRPDL        | 1.508895 | FADD      | 0.723624 |
| C6orf111             | 1.678955 | TBCC             | 1.655036 | IFITM2        | 1.506512 | RNASEH2A  | 0.72083  |
| ADNP2                | 1.674116 | MOAP1            | 1.647446 | CYR61         | 1.503113 | LOC641814 | 0.705275 |
| LOC653186<br>0.70269 | 0.70269  | LOC64491<br>4    | 0.675202 | CENTG2        | 0.657989 | FAM171A1  | 0.635709 |
| UBE2C                | 0.702552 | LOC10012<br>7888 | 0.673982 | COL13A1       | 0.651101 | SLCO4A1   | 0.635489 |
| LOC440926            | 0.699038 | CYP2R1           | 0.667403 | LOC641849     | 0.648189 | PPPDE1    | 0.634665 |
| NCAPD2               | 0.696543 | FANCG            | 0.66346  | TGOLN2        | 0.644694 | PATL1     | 0.630256 |
| LOC390466            | 0.693594 | IPO9             | 0.663191 | C18orf55      | 0.642106 | SPC24     | 0.626878 |
| HIRIP3               | 0.678618 | MRPS16           | 0.660576 | CAMK2N1       | 0.640622 | KRI1      | 0.617245 |
| LOC729964            | 0.675395 | E2F2             | 0.65874  | HNRNPA0       | 0.639678 | TCFL5     | 0.610155 |
| LOC727761            | 0.609679 | KANK2            | 0.555448 | UCN2          | 0.530354 | KIF15     | 0.57749  |
| C5orf21              | 0.607568 | TBL1X            | 0.550564 | NT5DC2        | 0.518712 | VEGFA     | 0.539428 |
| LOC92755             | 0.607203 | FLJ12949         | 0.547968 | NPLOC4        | 0.468267 | TCEB3     | 0.270787 |

**Supplementary Table S8:** The list of 219 differentially expressed genes after depletion of hsa-miR-195 in MDA MB-231 cells

| GENE      | FOL D CHANGE | GENE      | FOL D CHANGE | GENE      | FOL D CHANGE | GENE      | FOL D CHANGE |
|-----------|--------------|-----------|--------------|-----------|--------------|-----------|--------------|
| MT1F      | 12.92171     | LOC283953 | 3.782871     | CST2      | 3.319776     | DPYSL3    | 3.171952     |
| GDF15     | 12.34118     | KLHL24    | 3.702341     | ASNS      | 3.287984     | PLEKHF1   | 3.162213     |
| HMOX1     | 8.011292     | WIP1      | 3.663805     | PDIA4     | 3.224833     | MVD       | 3.148995     |
| MUC5AC    | 7.750373     | CLIC3     | 3.654506     | DDIT4     | 3.219646     | C17orf91  | 3.147308     |
| S100P     | 7.730428     | FICD      | 3.565174     | ZBTB20    | 3.209615     | ABHD4     | 3.134516     |
| PARM1     | 7.121587     |           | 3.543995     | LOC158160 | 3.191313     | NDRG1     | 3.014372     |
| AGR2      | 6.929166     | TMEM150A  | 3.440866     | DPYSL3    | 3.171952     | EDEM1     | 2.997954     |
| NUPR1     | 6.866367     | PCSK9     | 3.374442     | PLEKHF1   | 3.162213     | SEC24D    | 2.989821     |
| LOC400750 | 6.605076     | ITGA10    | 3.349686     | MVD       | 3.148995     | LOC642567 | 2.988706     |
| PTGS2     | 6.601668     | RARRES3   | 3.330806     | C17orf91  | 3.147308     | CBLB      | 2.983402     |
| SEL1L3    | 6.448566     | CST2      | 3.319776     | ABHD4     | 3.134516     | GLT25D2   | 2.95367      |
| FTH1      | 6.205678     | ASNS      | 3.287984     | NDRG1     | 3.014372     | FTHL2     | 2.938135     |
| C17orf28  | 6.1478       | PDIA4     | 3.224833     | EDEM1     | 2.997954     | LZTFL1    | 2.900801     |
| HSPA5     | 6.145937     | DDIT4     | 3.219646     | SEC24D    | 2.989821     | TP53INP2  | 2.889429     |
| DDIT3     | 6.017756     | ZBTB20    | 3.209615     | LOC642567 | 2.988706     | IGDCC4    | 2.880479     |
| TRIB3     | 5.860122     | LOC158160 | 3.191313     | CBLB      | 2.983402     | GLRX      | 2.870043     |
| PIK3IP1   | 5.762268     | DPYSL3    | 3.171952     | GLT25D2   | 2.95367      | WARS      | 2.849307     |
| TXNIP     | 5.591399     | PLEKHF1   | 3.162213     | FTHL2     | 2.938135     | UGDH      | 2.849168     |
| DNAJB9    | 5.525446     | MVD       | 3.148995     | LZTFL1    | 2.900801     | KIAA0182  | 2.845813     |
| HMGCS1    | 5.451573     | C17orf91  | 3.147308     | TP53INP2  | 2.889429     | LBA1      | 2.816353     |
| MAL2      | 5.225329     | ABHD4     | 3.134516     | IGDCC4    | 2.880479     | MIR1974   | 2.813848     |
| HERPUD1   | 5.136469     | NDRG1     | 3.014372     | GLRX      | 2.870043     |           | 2.801774     |
| ISG20     | 4.993204     | EDEM1     | 2.997954     | WARS      | 2.849307     | GABARAPL1 | 2.795643     |
| IL24      | 4.836435     | SEC24D    | 2.989821     | UGDH      | 2.849168     | DHCR7     | 2.791779     |
| LOC651309 | 4.762677     | LOC642567 | 2.988706     | KIAA0182  | 2.845813     |           | 2.776056     |
| OASL      | 4.656957     | CBLB      | 2.983402     | LBA1      | 2.816353     | SQSTM1    | 2.764781     |
| SESN2     | 4.537008     | GLT25D2   | 2.95367      | MIR1974   | 2.813848     | HYOU1     | 2.755111     |
| CYP1B1    | 4.530764     | FTHL2     | 2.938135     |           | 2.801774     | FTHL11    | 2.747572     |
| TP53INP1  | 4.502775     | LOC283953 | 3.782871     | GABARAPL1 | 2.795643     | YPEL3     | 2.731676     |
| STOX2     | 4.391771     | KLHL24    | 3.702341     | CST2      | 3.319776     | SC5DL     | 2.708963     |
| SDF2L1    | 4.351683     | WIP1      | 3.663805     | ASNS      | 3.287984     | LOC729009 | 2.701955     |
| GENE      | FOL D        | GENE      | FOL D        | GENE      | FOL D        | GENE      | FOL D        |

|               | CHANGE   |               | CHANGE   |                  | CHANGE   |              | CHANGE   |
|---------------|----------|---------------|----------|------------------|----------|--------------|----------|
| TMEM50B       | 4.322087 | CLIC3         | 3.654506 | PDIA4            | 3.224833 | IFI44        | 2.700555 |
| CRELD2        | 4.313261 | FICD          | 3.565174 | DDIT4            | 3.219646 | BTN3A3       | 3.848782 |
| IL6           | 4.131138 |               | 3.543995 | ZBTB20           | 3.209615 | CTH          | 3.840209 |
| SPINK4        | 4.093725 | TMEM150<br>A  | 3.440866 | LOC15816<br>0    | 3.191313 | ITGA10       | 3.349686 |
| ANG           | 3.858606 | PCSK9         | 3.374442 | GPT2             | 2.259324 | RARRES3      | 3.330806 |
| NPEPL1        | 2.686811 | CST4          | 2.666683 | ANKRD29          | 2.255791 | CALR         | 1.994345 |
| CYP4V2        | 2.681988 | PLD1          | 2.66507  | BHLHB2           | 2.254975 | GFPT1        | 1.981992 |
| FDFT1         | 2.681575 | AKR1C3        | 2.650522 | ISG15            | 2.237997 | FTHL16       | 1.977865 |
| CST4          | 2.666683 |               | 2.647828 | NOV              | 2.236305 | TICAM2       | 1.973222 |
| PLD1          | 2.66507  | C5orf41       | 2.632938 |                  | 2.229196 | FNDC3B       | 1.964631 |
| AKR1C3        | 2.650522 | KYNU          | 2.615341 | TRIM2            | 2.218492 | ENPP1        | 1.940911 |
|               | 2.647828 | ARMET         | 2.61024  | SNTB1            | 2.217562 | YPEL5        | 1.932436 |
| C5orf41       | 2.632938 | FAIM3         | 2.610073 | MXD4             | 2.214417 | CEBPB        | 1.916925 |
| KYNU          | 2.615341 | INSIG1        | 2.602511 | SLC3A2           | 2.209719 | DNAH2        | 1.905113 |
| ARMET         | 2.61024  | CDRT4         | 2.59641  | TOM1             | 2.208385 | ALDH3A2      | 1.897843 |
| FAIM3         | 2.610073 |               | 2.585514 | CSF2             | 2.203935 | DNASE2       | 1.881188 |
| INSIG1        | 2.602511 | LOC28498<br>8 | 2.578735 | LOC10013<br>4294 | 2.20161  | ST3GAL6      | 1.880142 |
| CDRT4         | 2.59641  | SYVN1         | 2.537388 | SQLE             | 2.199471 | C20orf127    | 1.879554 |
|               | 2.585514 | RASD1         | 2.525786 | FTHL3            | 2.194639 | NPC1         | 1.87247  |
| LOC28498<br>8 | 2.578735 | CYP51A1       | 2.524228 | SIK1             | 2.177892 | MAP1LC3<br>B | 1.870552 |
| SYVN1         | 2.537388 |               | 2.51016  | MEF2D            | 2.167861 | DERL2        | 1.867962 |
| RASD1         | 2.525786 | NUCB2         | 2.508457 | MVP              | 2.164221 | TMEM41B      | 1.865482 |
| CYP51A1       | 2.524228 | RHOB          | 2.501659 | EDEM2            | 2.157266 | CANX         | 1.861614 |
|               | 2.51016  | NR4A2         | 2.472255 | C4orf34          | 2.143418 | GARS         | 1.858383 |
| NUCB2         | 2.508457 | NQO1          | 2.441649 | SLC9A3R1         | 2.13799  | PHGDH        | 1.855167 |
| RHOB          | 2.501659 | ANKRD33       | 2.427613 | RBCK1            | 2.136853 | MT1G         | 1.8268   |
| NR4A2         | 2.472255 | LOC39094<br>0 | 2.398996 | HERC6            | 2.126279 | NEU1         | 1.822984 |
| NQO1          | 2.441649 | ME1           | 2.395729 | BEX2             | 2.110272 | FADS1        | 1.819838 |
| ANKRD33       | 2.427613 | HBP1          | 2.38926  | FTHL8            | 2.084453 | FAM46A       | 1.81892  |
| LOC39094<br>0 | 2.398996 | GBP2          | 2.366766 | TRA1P2           | 2.079019 | DNAJB11      | 1.818558 |
| ME1           | 2.395729 | C7orf54       | 2.356919 | ANGPTL2          | 2.074981 | NSDHL        | 1.814089 |
| HBP1          | 2.38926  | IDI1          | 2.344755 | SLC2A3           | 2.071603 | PTGES        | 1.810826 |
| GBP2          | 2.366766 | KLF9          | 2.340772 | STX3             | 2.057944 | OSBP         | 1.807698 |
| C7orf54       | 2.356919 | IFIT2         | 2.325264 | MT1X             | 2.050466 | MFGE8        | 1.792728 |
| IDI1          | 2.344755 | XBP1          | 2.312835 | HMGCR            | 2.046453 | ARHGEF3      | 1.792677 |
| KLF9          | 2.340772 | TMEM154       | 2.311618 | GPX3             | 2.040075 | CREB3L2      | 1.791394 |
| IFIT2         | 2.325264 | LOC39053<br>0 | 2.308309 | CLIC6            | 2.034932 | BRI3P1       | 1.7851   |
| XBP1          | 2.312835 | CDK2AP2       | 2.303611 | CARS             | 2.025904 | TNIP1        | 1.769195 |
| GENE          | FOL D    | GENE          | FOL D    | GENE             | FOL D    | GENE         | FOL D    |

|                  | CHANGE   |          | CHANGE   |          | CHANGE   |                  | CHANGE   |
|------------------|----------|----------|----------|----------|----------|------------------|----------|
| TMEM154          | 2.311618 | TFF3     | 2.301527 | LGMN     | 2.025268 | MSTO1            | 1.749158 |
| CDK2AP2          | 2.303611 | HSP90B1  | 2.294493 | LOC88523 | 2.003911 | TM7SF2           | 1.745965 |
| TFF3             | 2.301527 | OPTN     | 2.288713 | RHBDF1   | 1.742093 | DKK1             | 0.642096 |
| NPEPL1           | 2.686811 | GMPPA    | 2.285267 | BRI3     | 1.728167 | TMEM137          | 0.57071  |
| CYP4V2           | 2.681988 | FTHL12   | 2.27762  | BLVRA    | 1.674488 | LOC10012<br>8337 | 0.563919 |
| FDFT1            | 2.681575 | ZC3H12C  | 2.27683  | ATP6V0A1 | 1.663229 | NCAPG2           | 0.535504 |
| LOC39053<br>0    | 2.308309 | KIAA1539 | 2.300405 | WFS1     | 1.634925 | KIF15            | 0.517118 |
| LOC10013<br>3372 | 0.51672  | RPL29    | 0.493789 | SLC39A10 | 0.460624 |                  |          |
| AOX1             | 0.494994 | RPS7     | 0.474291 | H2AFX    | 0.435937 |                  |          |
